# Supplementary material
Source: PubMed Central journal article supplement (PMC7481672)
Supplement: rsta20190365supp1.pdf [file rsta20190365supp1.pdf]

## SUPPLEMENTARY MATERIAL

Solan M, Ward ER, Wood CL, Reed AJ, Grange LJ, Godbold JA

Climate driven benthic invertebrate activity and biogeochemical functioning across the Barents Sea Polar Front  
*Phil. Trans. Roy. Soc. A* (doi.org/10.1098/rsta.2019.0365)

### Data availability

All data used to generate this manuscript are openly available from the Discovery Metadata System (<https://www.bas.ac.uk/project/dms/>), a data catalogue hosted by The UK Polar Data Centre (UK PDC, <https://www.bas.ac.uk/data/uk-pdc/>). These data supported the present manuscript:

- Solan, M., Godbold, J., Grange, L., Ward, E. R., Wood, C., & Reed, A. (2020). Experimental measurements for replicate macrofaunal communities from the Western Barents Sea for summer 2017 and 2018 (Version 1.0) [Data set]. UK Polar Data Centre, Natural Environment Research Council, UK Research & Innovation. <https://doi.org/10.5285/62A44C8D-5593-4D2C-93D9-5DDFEBFCBFC36>
- Solan, M., Godbold, J., Grange, L., Ward, E. R., Wood, C., & Reed, A. (2020). Fluorescent sediment profile images (fSPI) for replicate macrofaunal communities from the Western Barents Sea for summer 2017 and 2018 (Version 1.0) [Data set]. UK Polar Data Centre, Natural Environment Research Council, UK Research & Innovation. <https://doi.org/10.5285/82771E90-65D6-4F56-B766-A16FE099FC98>
- Solan, M., Godbold, J., Grange, L., Ward, E. R., Wood, C., & Reed, A. (2020). Sediment surface images (SSI) for replicate macrofaunal communities from the Western Barents Sea for summer 2018 (Version 1.0) [Data set]. UK Polar Data Centre, Natural Environment Research Council, UK Research & Innovation. <https://doi.org/10.5285/B62AF357-CBEE-4A98-894B-5ED3C11CEF7D>
- Solan, M., Godbold, J., Grange, L., Ward, E. R., Wood, C., & Reed, A. (2020). Vertical luminophore particle tracer profiles expressed as relative counts for replicate macrofaunal communities from the Western Barents Sea in summer 2017 and 2018 (Version 1.0) [Data set]. UK Polar Data Centre, Natural Environment Research Council, UK Research & Innovation. <https://doi.org/10.5285/260B15B1-F814-4941-84CD-9CD94F386F33>
- Solan, M., Godbold, J., Grange, L., Ward, E. R., Wood, C., & Reed, A. (2020). Macrofaunal abundance and biomass for replicate macrofaunal communities from the Western Barents Sea for summer 2017 and 2018 (Version 1.0) [Data set]. UK Polar Data Centre, Natural Environment Research Council, UK Research & Innovation. <https://doi.org/10.5285/7FBCA0A1-E2C1-4265-A7A5-713451CB52C0>
- Solan, M., Godbold, J., Grange, L., Ward, E. R., Wood, C., & Reed, A. (2020). Sediment organic material by loss on ignition for stations from the Western Barents Sea for summer 2017 and 2018 (Version 1.0) [Data set]. UK Polar Data Centre, Natural Environment Research Council, UK Research & Innovation. <https://doi.org/10.5285/24BE3CC9-4F49-4812-99CE-2F6668541E98>
- Solan, M., Godbold, J., Grange, L., Ward, E. R., Wood, C., & Reed, A. (2020). Sediment particle size analysis for stations from the Western Barents Sea for summer 2017 and 2018 (Version 1.0) [Data set]. UK Polar Data Centre, Natural Environment Research Council, UK Research & Innovation. <https://doi.org/10.5285/C6285ED6-0A44-4115-8F7C-C099B9B358EA>

Cruise reports for this research programme can be obtained from the British Oceanographic Data Centre at:

[https://www.bodc.ac.uk/resources/inventories/cruise\\_inventory/results/](https://www.bodc.ac.uk/resources/inventories/cruise_inventory/results/)

Cottier FR. 2017 RRS James Clark Ross cruise, JR16006

Solan M. 2018 RRS James Clark Ross cruise, JR17007

Barnes D. 2019 RRS James Clark Ross cruise, JR18006 (not relevant to the present manuscript, but listed here as it forms the third and final cruise of this research programme).

**Figure S1.** The daily sea ice extent values for 2<sup>nd</sup> December 2014 to 28<sup>th</sup> January 2020 at 1km grid cell size resolution for the Barents Sea region obtained from the Multisensor Analyzed Sea Ice Extent (MASIE) product (<https://nsidc.org/data/G02186/versions/1>; Fetterer et al. 2010) at the National Snow and Ice Data Center (<http://nsidc.org/>). Years are indicated by colour (2014, black; 2015, red; 2016, green; 2017, blue; 2018, cyan; 2019, magenta; 2020, yellow). The period of station occupancy for research cruise JCR16006 in 2017, and JCR17007 in 2018, are indicated (grey horizontal bars).

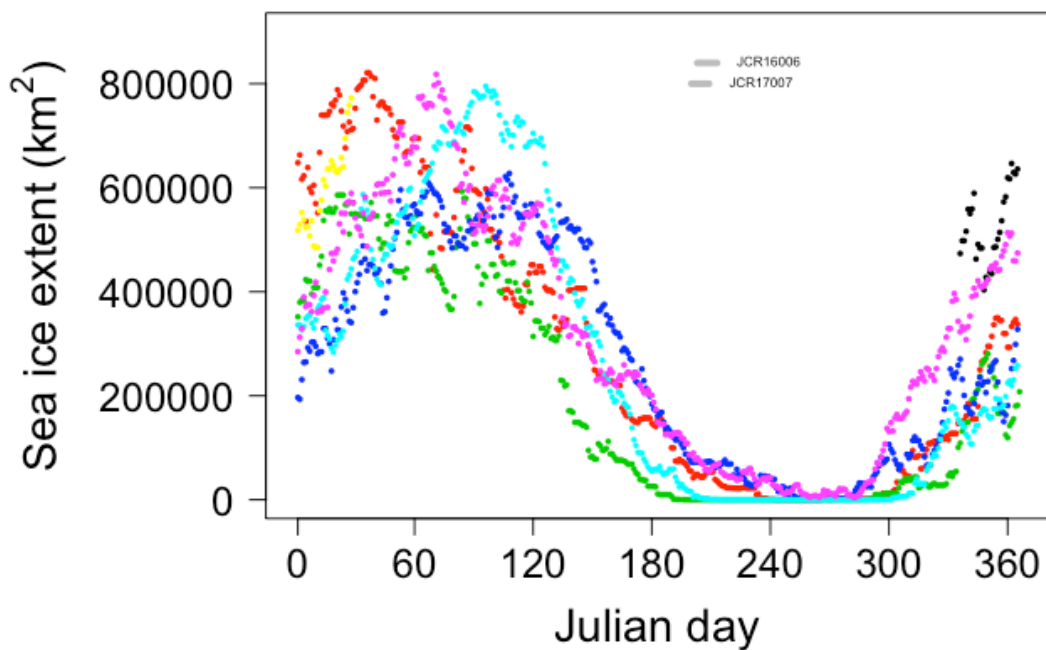

**Table S1:** Summary of the geographical position, water column depth and timing of each box core obtained for this study during research cruises JCR16006 and JCR17007, RRS James Clark Ross. Each deployment of the box core is associated with a cruise event number from the ship log. Timings refer to the ship position at the point of bottom contact during box core deployment.

| Cruise   | Station | Event number | Latitude (N) | Longitude (E) | Depth (m) | Time (UTC) and date at bottom |
|----------|---------|--------------|--------------|---------------|-----------|-------------------------------|
| JCR16006 | B13     | 331          | 74.49999     | 29.99977      | 359       | 02:38, 01 August 2017         |
|          |         | 332          | 74.50018     | 29.99978      | 359       | 03:06, 01 August 2017         |
|          |         | 333          | 74.50019     | 30.00041      | 359       | 03:33, 01 August 2017         |
|          |         | 334          | 74.50003     | 30.00036      | 358       | 04:03, 01 August 2017         |
| JCR16006 | B14     | 318          | 76.50033     | 30.50090      | 293       | 03:08, 31 July 2017           |
|          |         | 319          | 76.50030     | 30.50174      | 293       | 03:34, 31 July 2017           |
|          |         | 320          | 76.50011     | 30.50173      | 294       | 04:02, 31 July 2017           |
|          |         | 321          | 76.49993     | 30.50174      | 294       | 04:27, 31 July 2017           |
| JCR16006 | B15     | 286          | 78.25026     | 30.00207      | 314       | 14:14, 29 July 2017           |
|          |         | 287          | 78.25015     | 30.00227      | 313       | 14:34, 29 July 2017           |
|          |         | 288          | 78.25004     | 30.00212      | 313       | 14:54, 29 July 2017           |
|          |         | 289          | 78.24998     | 30.00209      | 313       | 15:14, 29 July 2017           |
| JCR16006 | B16     | 200          | 80.11071     | 30.03578      | 286       | 19:42, 22 July 2017           |
|          |         | 201          | 80.11678     | 30.06457      | 281       | 20:13, 22 July 2017           |
|          |         | 203          | 80.10758     | 30.03939      | 288       | 21:50, 22 July 2017           |
|          |         | 205          | 80.11099     | 30.07918      | 280       | 22:43, 22 July 2017           |
| JCR16006 | B17     | 227          | 81.27498     | 29.26483      | 335       | 16:25, 24 July 2017           |
|          |         | 228          | 81.27642     | 29.24559      | 335       | 16:57, 24 July 2017           |
|          |         | 229          | 81.27892     | 29.23538      | 332       | 17:23, 24 July 2017           |
|          |         | 230          | 81.28249     | 29.23142      | 326       | 17:50, 24 July 2017           |
| JCR17007 | B13     | 289          | 74.50010     | 29.99813      | 358       | 06:40, 28 July 2018           |
|          |         | 291          | 74.50028     | 29.99748      | 359       | 07:40, 28 July 2018           |
|          |         | 292          | 74.50008     | 29.99748      | 360       | 08:08, 28 July 2018           |
|          |         | 293          | 74.49990     | 29.99755      | 359       | 08:38, 28 July 2018           |
| JCR17007 | B14     | 237          | 76.49917     | 30.49924      | 293       | 15:48, 25 July 2018           |
|          |         | 238          | 76.49923     | 30.49987      | 294       | 16:13, 25 July 2018           |
|          |         | 239          | 76.49925     | 30.50065      | 294       | 16:40, 25 July 2018           |
|          |         | 240          | 76.49940     | 30.50113      | 296       | 17:06, 25 July 2018           |
| JCR17007 | Xs      | 270          | 77.03279     | 29.33267      | 228       | 05:04, 27 July 2018           |
|          |         | 271          | 77.03288     | 29.33338      | 229       | 05:27, 27 July 2018           |
|          |         | 272          | 77.03290     | 29.33407      | 230       | 05:50, 27 July 2018           |
|          |         | 273          | 77.03305     | 29.33449      | 235       | 06:13, 27 July 2018           |
| JCR17007 | B15     | 205          | 78.25151     | 30.00001      | 317       | 08:04, 24 July 2018           |
|          |         | 206          | 78.25149     | 29.99928      | 318       | 08:32, 24 July 2018           |
|          |         | 207          | 78.25161     | 29.99843      | 318       | 09:01, 24 July 2018           |
|          |         | 208          | 78.25142     | 29.99809      | 319       | 09:32, 24 July 2018           |
| JCR17007 | B16     | 189          | 80.11620     | 30.06719      | 283       | 09:13, 23 July 2018           |
|          |         | 190          | 80.11618     | 30.06817      | 285       | 09:39, 23 July 2018           |
|          |         | 191          | 80.11634     | 30.06881      | 279       | 10:04, 23 July 2018           |
|          |         | 192          | 80.11642     | 30.06969      | 280       | 10:35, 23 July 2018           |
| JCR17007 | B17     | 134          | 81.28105     | 29.32781      | 337       | 04:45, 19 July 2018           |
|          |         | 135          | 81.28124     | 29.32828      | 337       | 05:15, 19 July 2018           |
|          |         | 136          | 81.28133     | 29.32941      | 337       | 05:43, 19 July 2018           |
|          |         | 137          | 81.28136     | 29.32802      | 345       | 06:13, 19 July 2018           |

**Figure S2:** Study area indicating (a) the position of stations B13-B17 and Xs, the bathymetry relative to chart datum and the generally accepted approximate position of the oceanographic (black) and benthic (grey) polar front. In (b), the position of each replicate box core (n = 4 station<sup>-1</sup> year<sup>-1</sup>: 2017, black; 2018, red) shows good agreement in site occupancy.

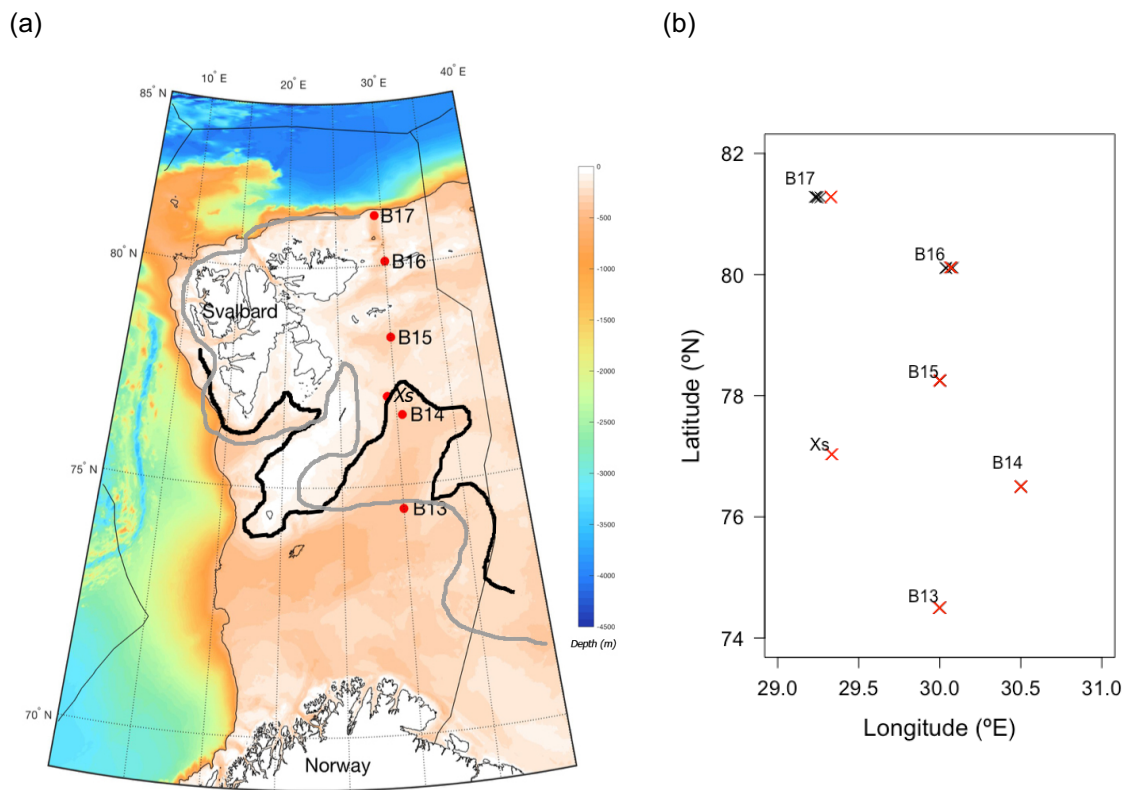

**Figure S3:** Retrieval of each intact core (LWH: 20 × 20 × 12 cm) obtained from (a) each of four replicate 0.1m<sup>2</sup> USNL (Unites States Naval Laboratory) box cores using a core extruder and (b-c), transferral to transparent acrylic aquaria (internal dimensions, LWH: 20 × 20 × 34 cm).

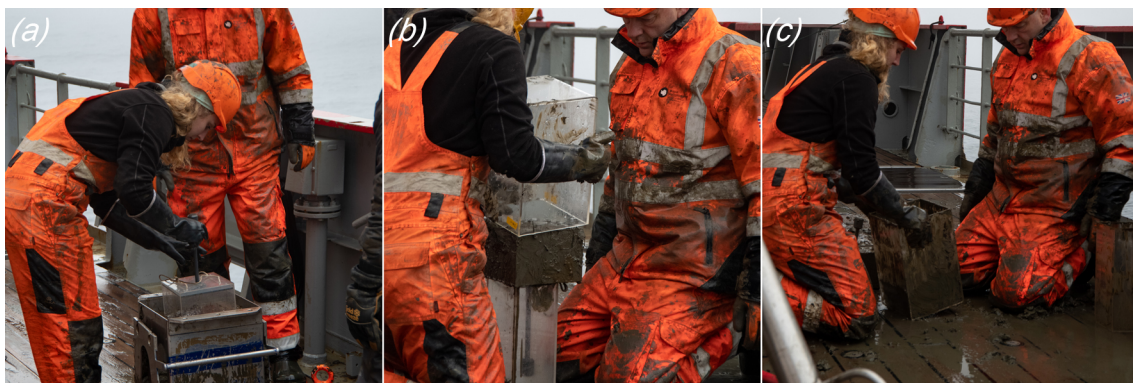

**Figure S4:** System of (a) interconnected insulated fibreglass seawater baths (lids removed, LWH: 1.2 x 1.2 x 0.8m) used to house the intact cores (retrieved as per Figure S3), with temperature controlled by a chiller (located top left of (a)). In each seawater bath, each aquarium was allocated a position randomly and (b) was continually aerated by bubbling through a glass pipette linked to a controllable air supply fed through the grey ducting. The green coloration in each aquarium are the luminophores used to track infaunal particle mixing.

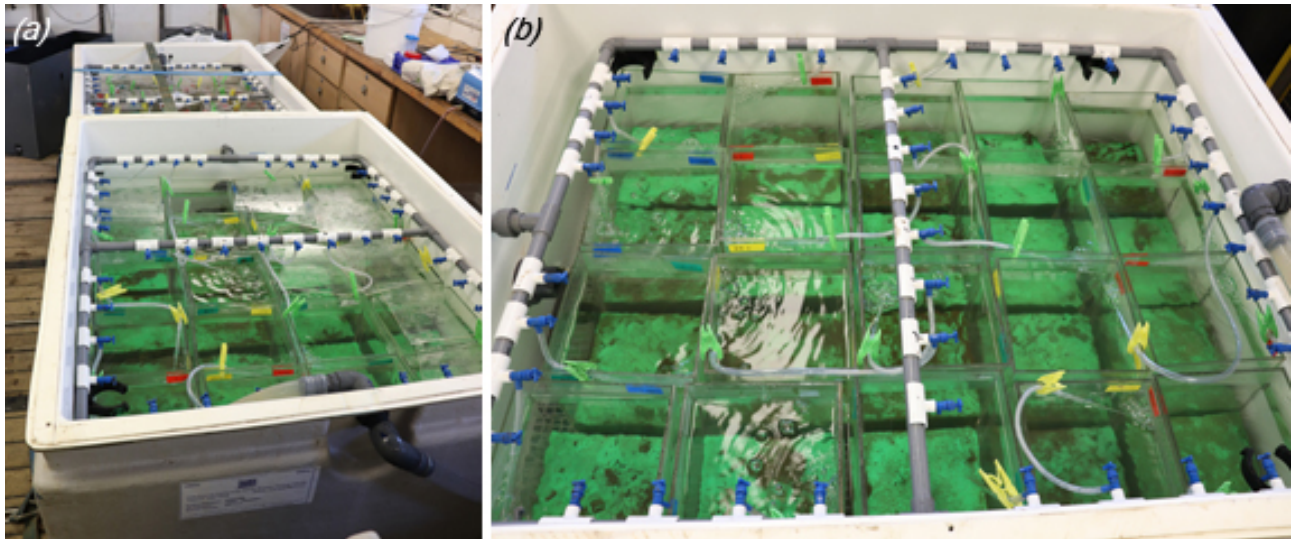

**Table S2:** The near bottom water temperatures from the proximate CTD (conductivity, temperature, depth) casts taken at each station. Data courtesy of Dr. Sian Henley, University of Edinburgh.

| Station         | Latitude (N) | Longitude (E) | Depth (m) | Bottle depth (m) | Temperature #1 (°C)<br>(mean ± s.d.) | Temperature #2 (°C)<br>(mean ± s.d.) | Time (UTC) and date (ddmmyy) |
|-----------------|--------------|---------------|-----------|------------------|--------------------------------------|--------------------------------------|------------------------------|
| <b>JCR16006</b> |              |               |           |                  |                                      |                                      |                              |
| B13             | 74.4998      | 29.9982       | 346       | 345.7            | 2.418                                | 2.418                                | 01:27, 01/08/17              |
| B14             | 76.4463      | 29.3272       | 243       | 231.6            | 1.444                                | 1.44                                 | 11:04, 31/07/17              |
| B15             | 78.2503      | 30.0073       | 316       | 299.3            | -1.442                               | -1.439                               | 13:19, 29/07/17              |
| B16             | 80.1513      | 29.9146       | 294       | 277.6            | -1.436                               | -1.438                               | 08:02, 22/07/17              |
| B17             | 81.4017      | 29.5033       | 291       | 278.0            | 1.756                                | 1.752                                | 08:00, 25/07/17              |
|                 |              |               |           |                  | (0.548±1.848)                        | (0.547±1.846)                        |                              |
| <b>JCR17007</b> |              |               |           |                  |                                      |                                      |                              |
| B13             | 74.5000      | 30.0002       | 357       | 350.6            | 0.802                                | 0.801                                | 03:54, 28/07/18              |
| B14             | 76.5000      | 30.5003       | 292       | 284.3            | 1.533                                | 1.532                                | 01:53, 25/07/18              |
| Xs              | 77.0333      | 29.3335       | 228       | 219.6            | 1.452                                | 1.451                                | 16:51, 26/07/18              |
| B15             | 78.2517      | 30.0002       | 313       | 303.1            | -0.554                               | -0.546                               | 11:37, 16/07/18              |
| B16             | 80.1167      | 30.0683       | 280       | 270.6            | 0.387                                | 0.386                                | 10:18, 22/07/18              |
| B17             | 81.2816      | 29.3269       | 334       | 327.5            | 0.982                                | 0.981                                | 06:37, 18/07/18              |
|                 |              |               |           |                  | (0.767±0.774)                        | (0.768±0.771)                        |                              |

**Figure S5:** Replicate (n=4) f-SPI images for (a) 2017 and (b) 2018 from station B13. The images (four aquarium sides are stitched together) are presented. The green coloration is the luminophore tracer.

(a)

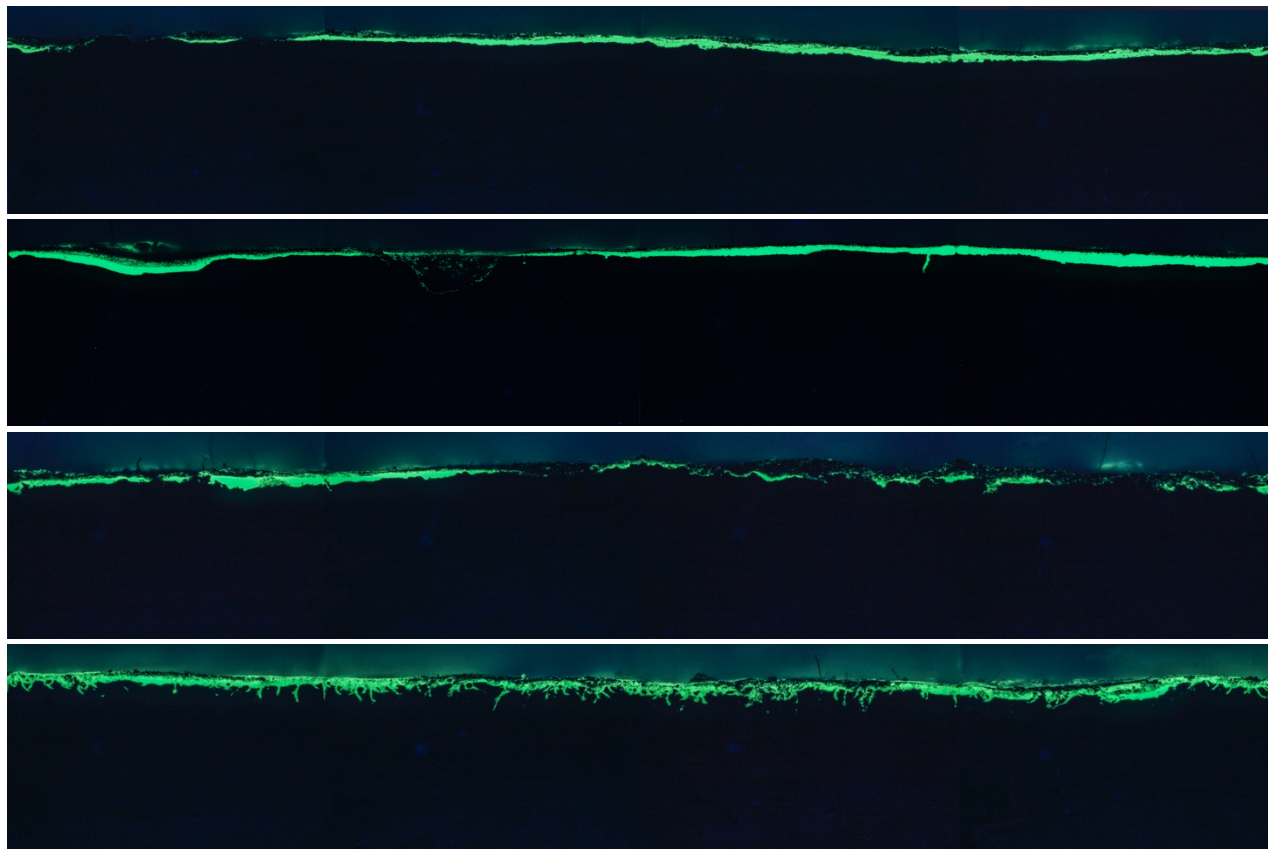

(b)

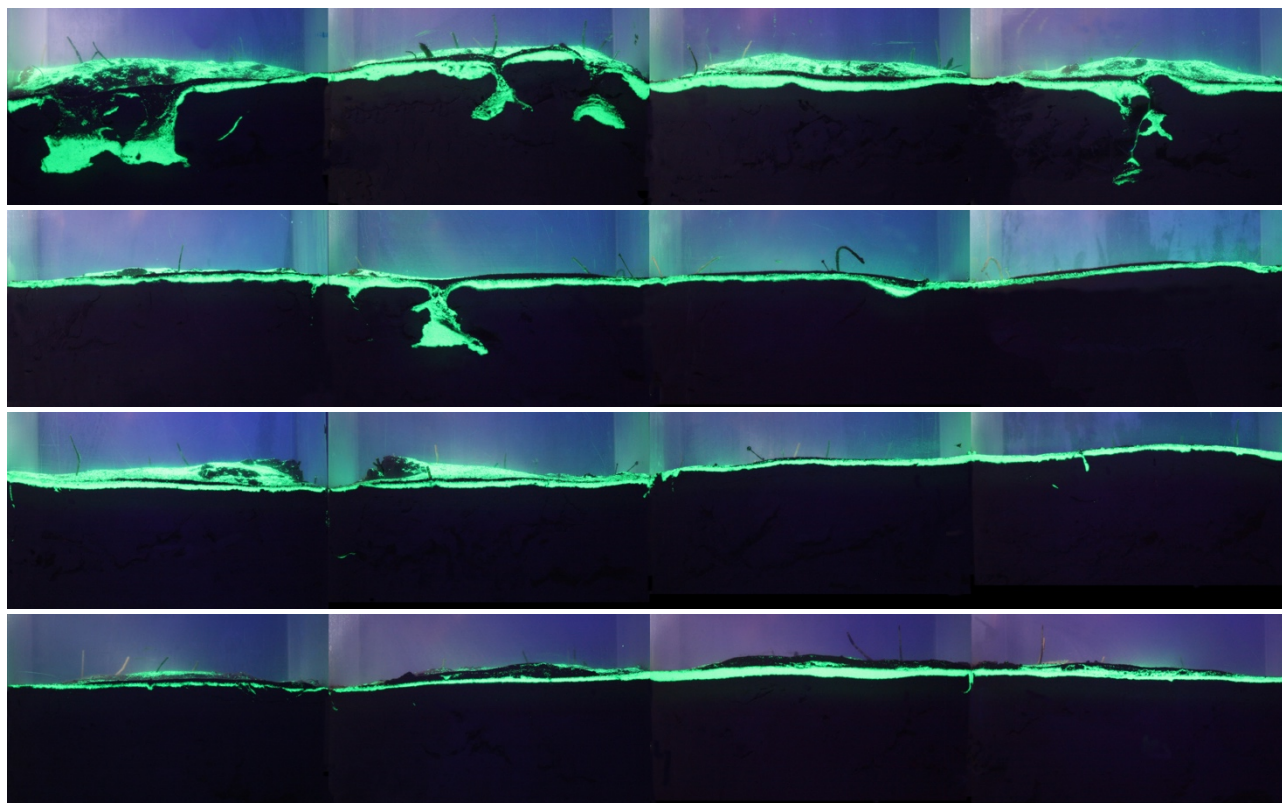

**Figure S6:** Replicate (n=4) f-SPI images for (a) 2017 and (b) 2018 from station B14. The images (four aquarium sides are stitched together) are presented. The green coloration is the luminophore tracer.

(a)

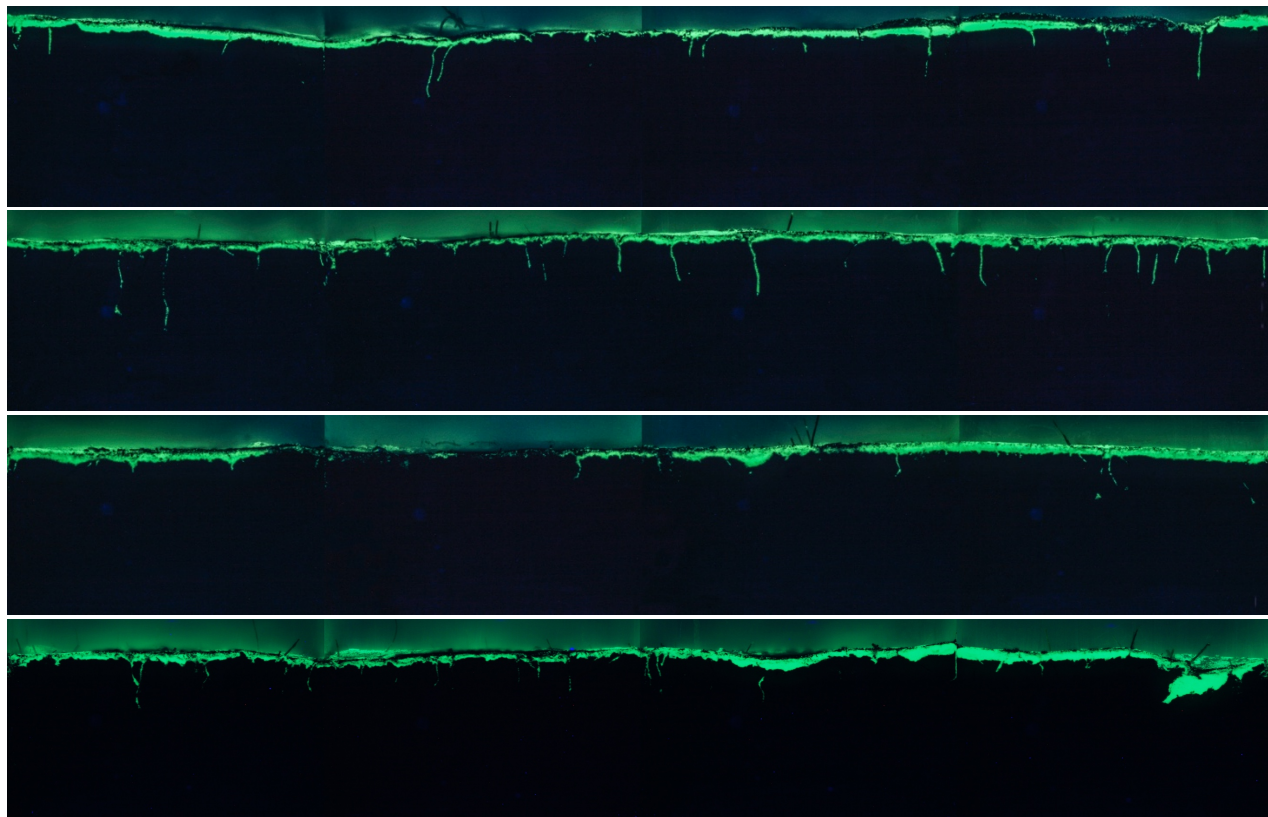

(b)

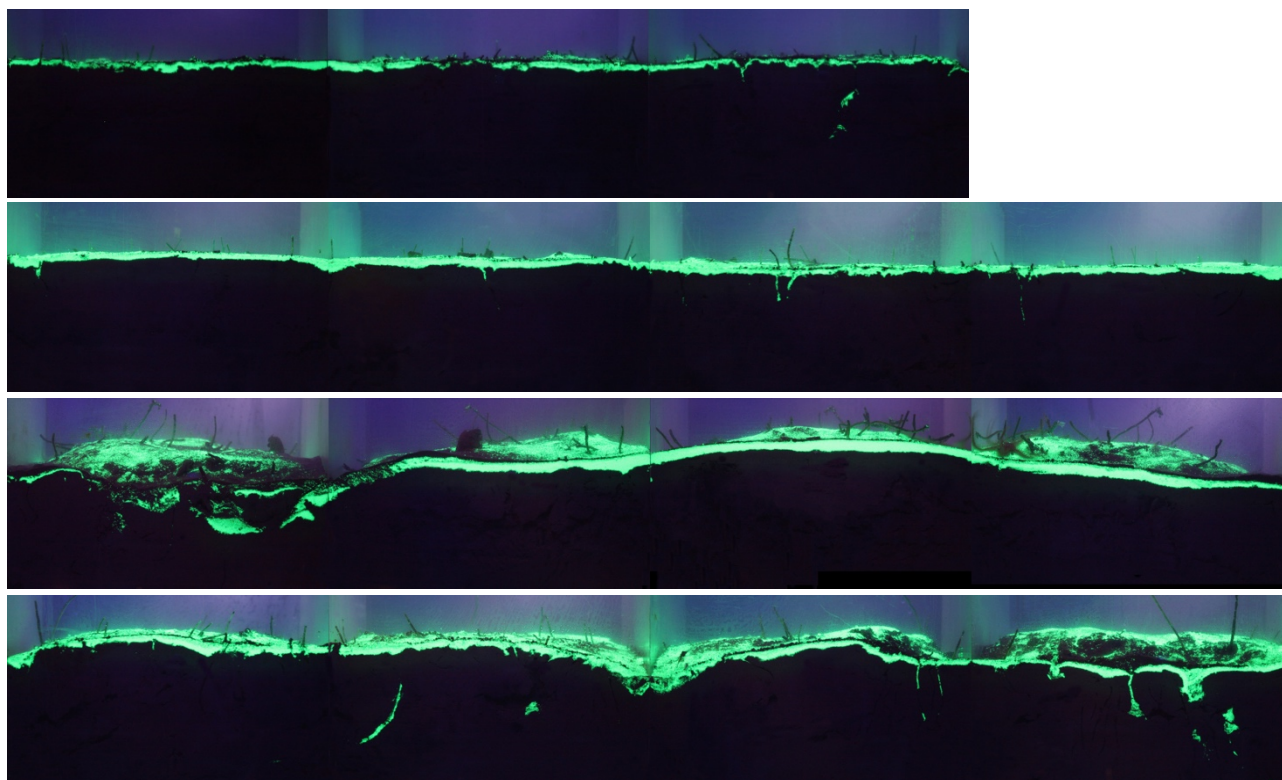

**Figure S7:** Replicate (n=4) f-SPI images for (a) 2017 and (b) 2018 from station B15. The images (four aquarium sides are stitched together) are presented. The green coloration is the luminophore tracer.

(a)

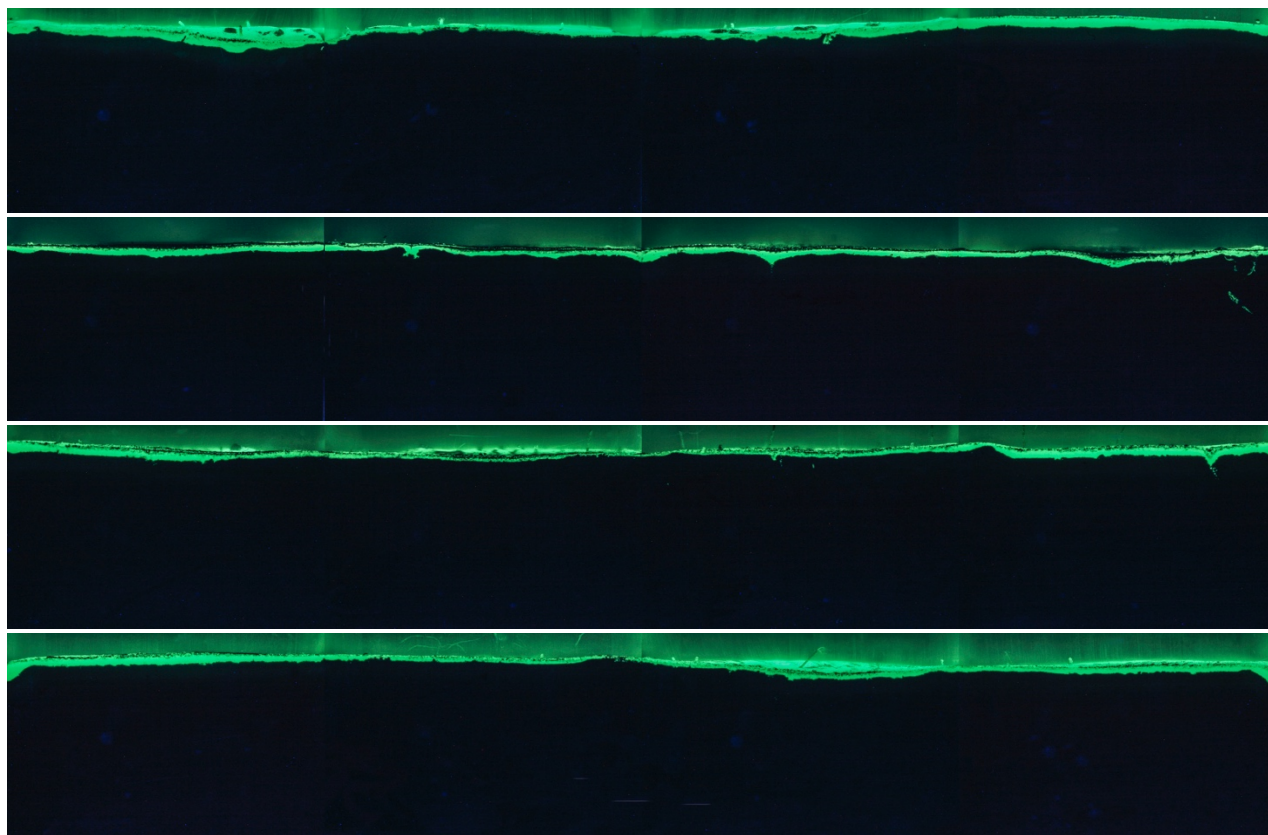

(b)

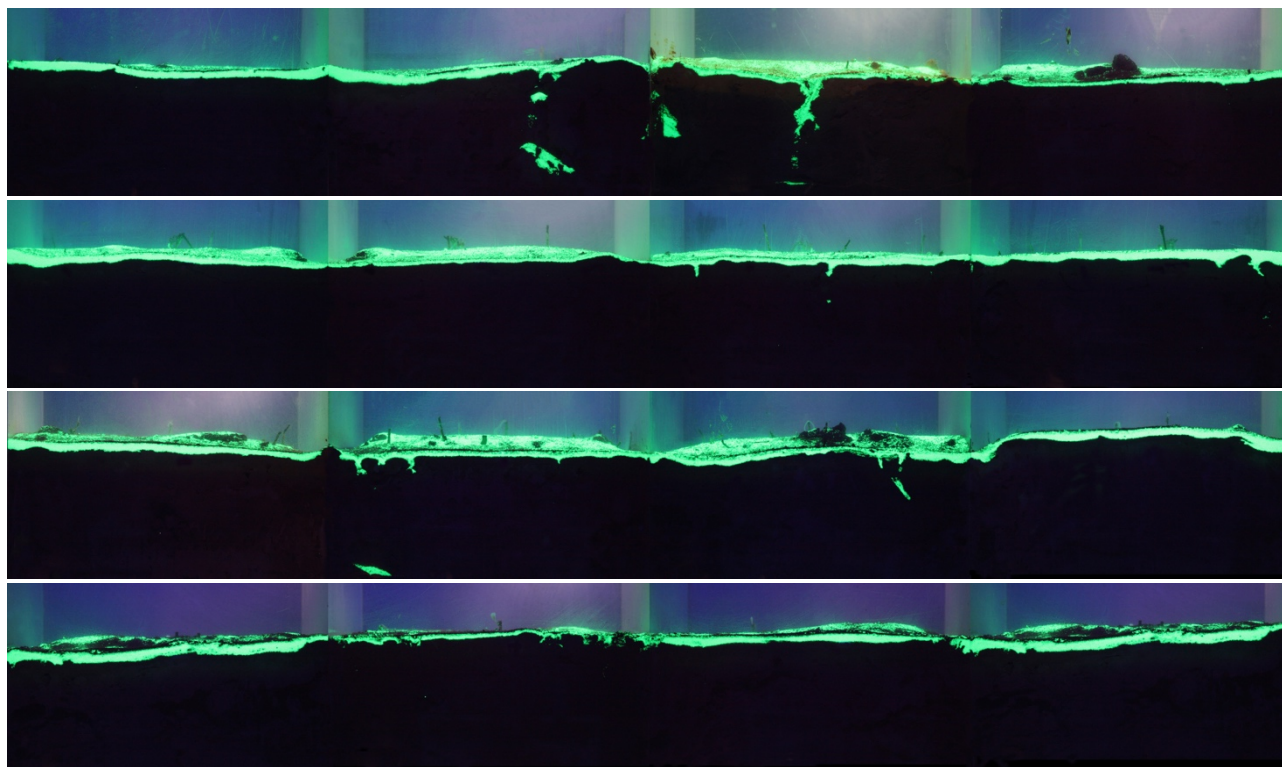



**Figure S8:** Replicate (n=4) f-SPI images for (a) 2017 and (b) 2018 from station B16. The images (four aquarium sides are stitched together) are presented. The green coloration is the luminophore tracer.

(a)

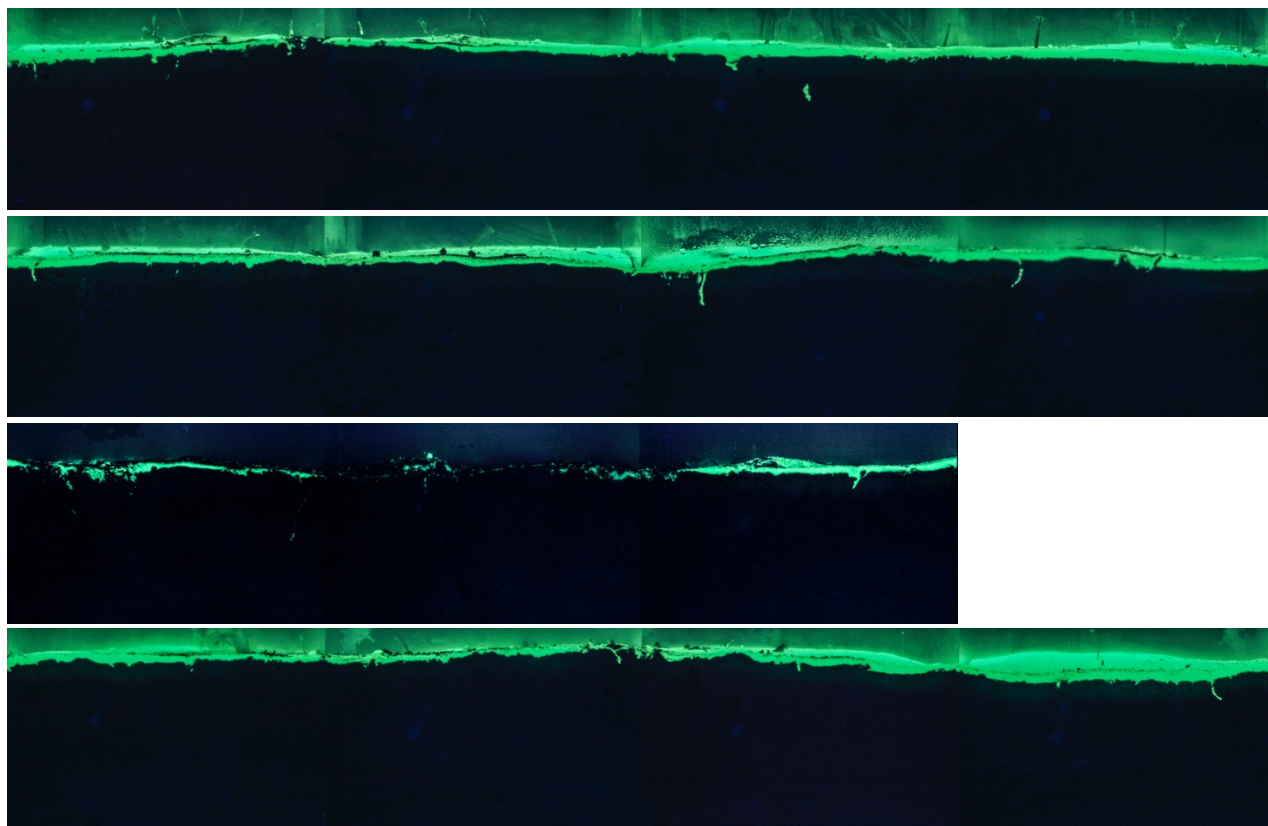

(b)

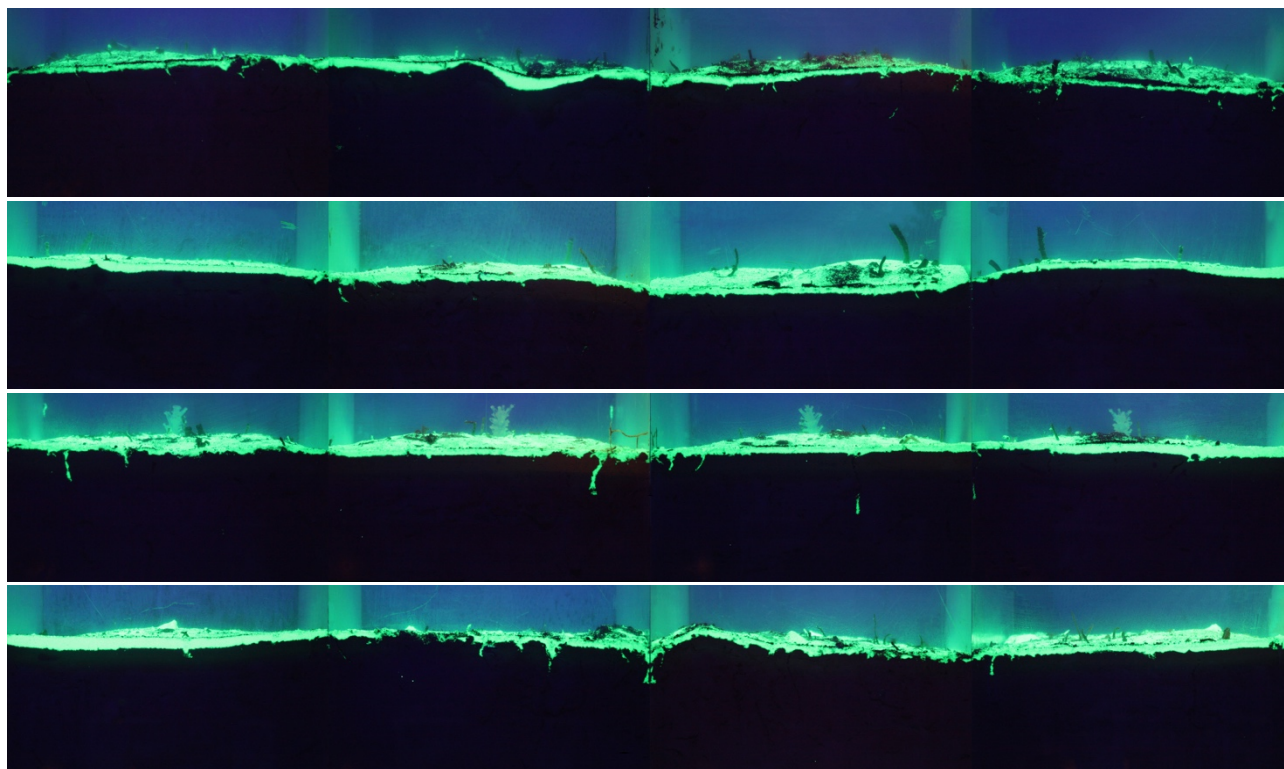

**Figure S9:** Replicate (n=4) f-SPI images for (a) 2017 and (b) 2018 from station B17. The images (four aquarium sides are stitched together) are presented. The green coloration is the luminophore tracer.

(a)

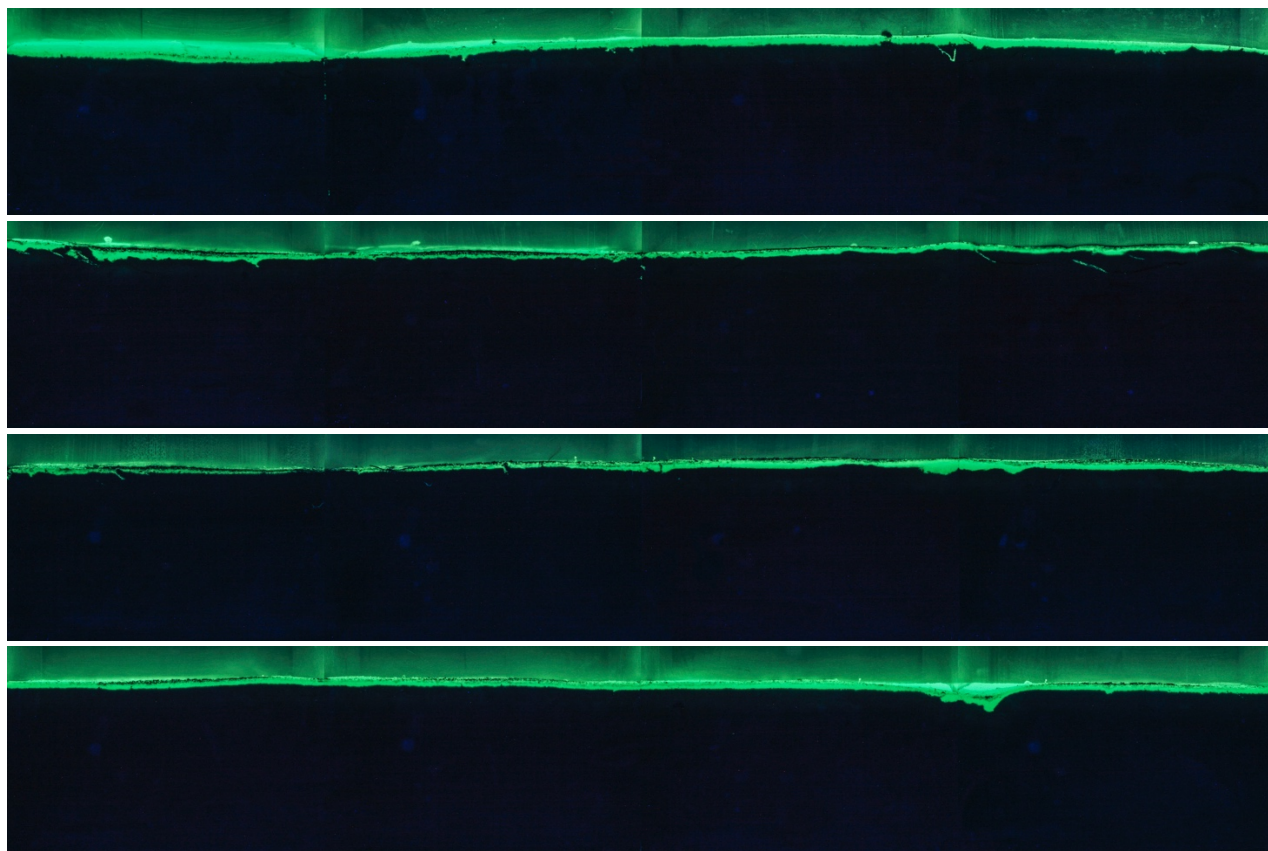

(b)

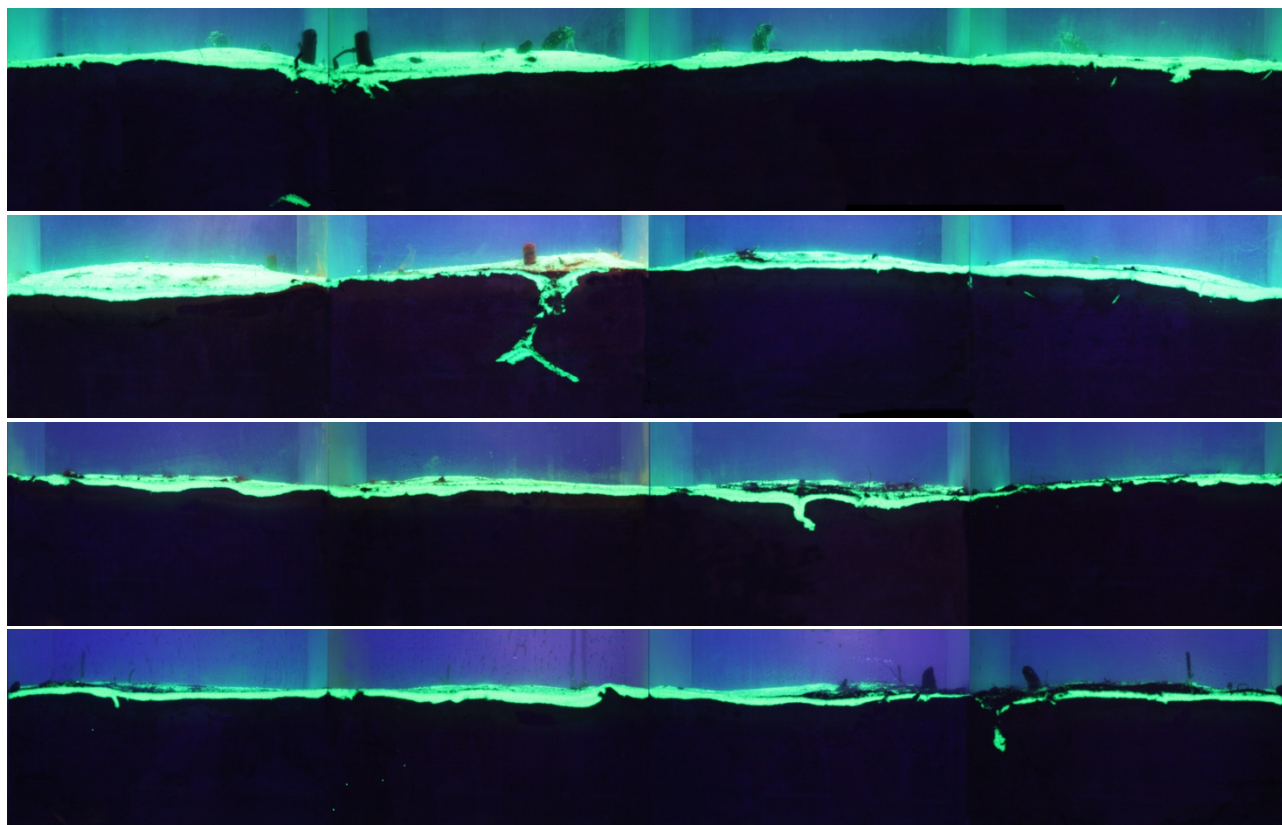

**Figure S10:** Replicate (n=4) f-SPI images for 2018 from station X<sub>s</sub>. The images (four aquarium sides are stitched together) are presented. The green coloration is the luminophore tracer.

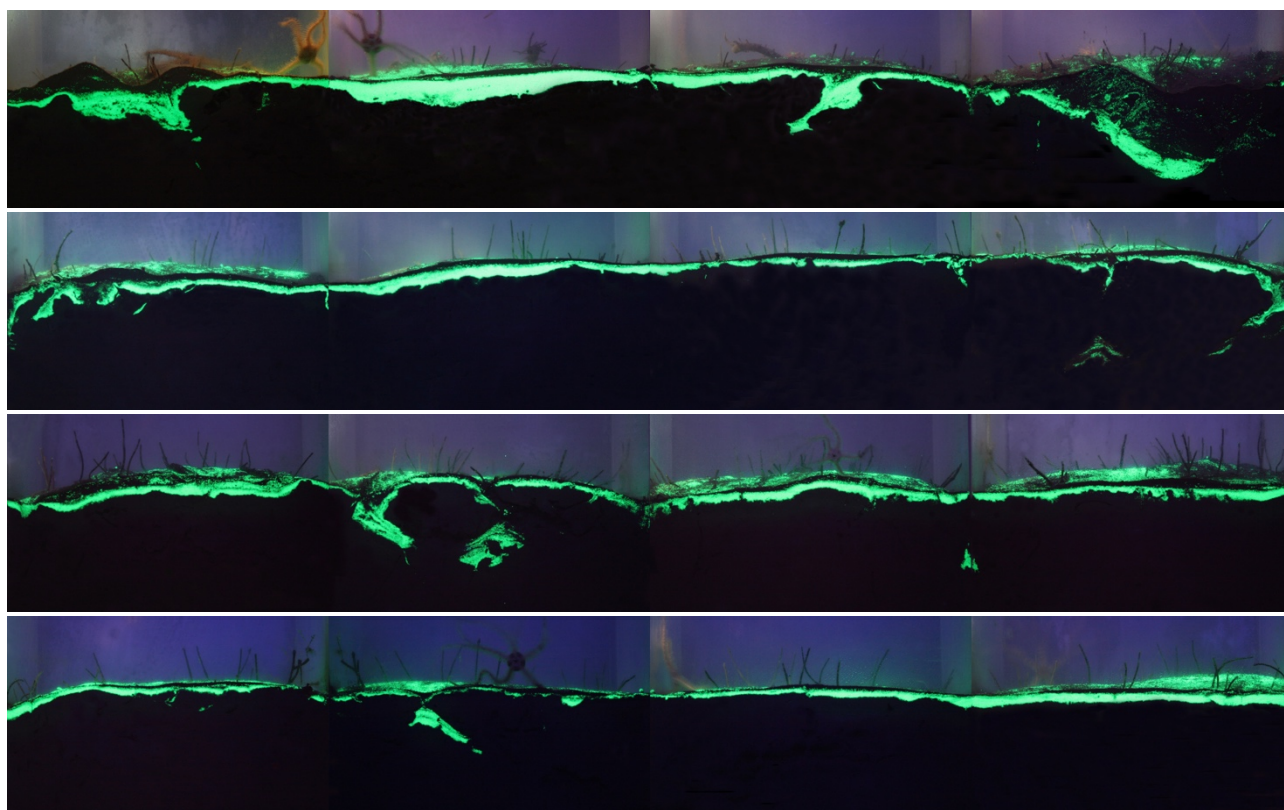

**Figure S11:** Sediment particle reworking profiles (n=4) derived from the 2017 f-SPI images for stations (a) B13, (b) B14, (c) B15, (d) B16 and (e) B17. Insets show detail of main figure.

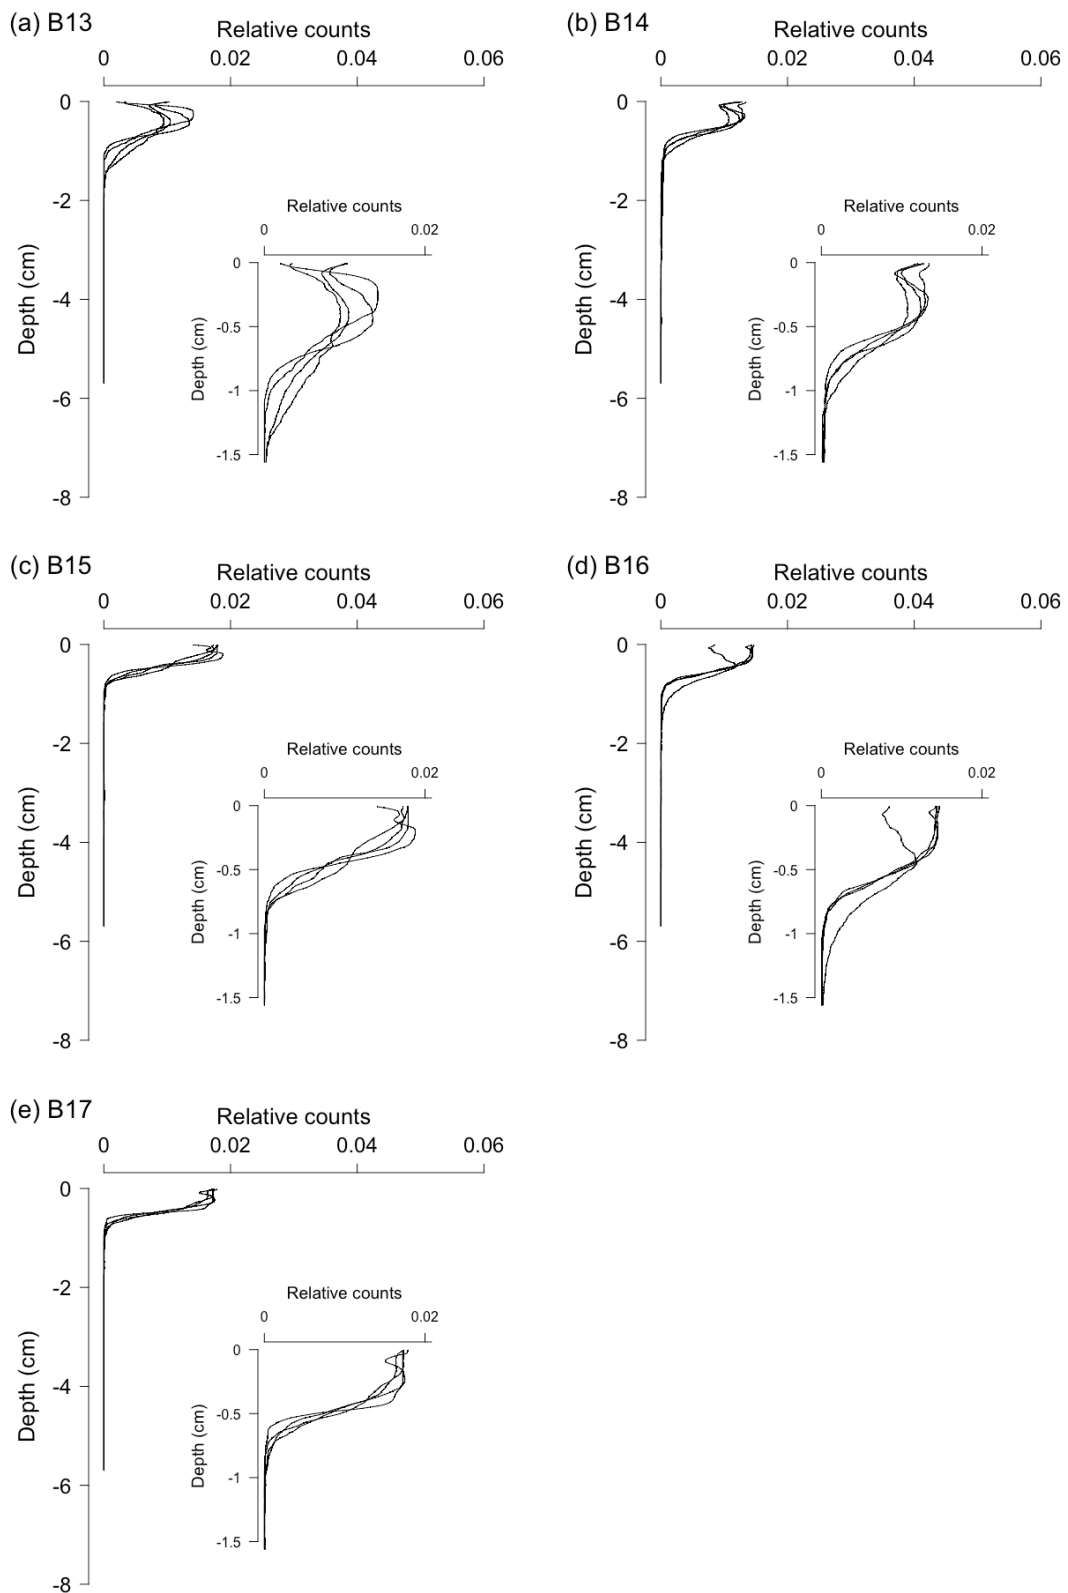

**Figure S12:** Sediment particle reworking profiles (n=4) derived from the 2018 f-SPI images for stations (a) B13, (b) B14, (c) B15, (d) B16, (e) B17 and (f) Xs. Insets show detail of main figure.

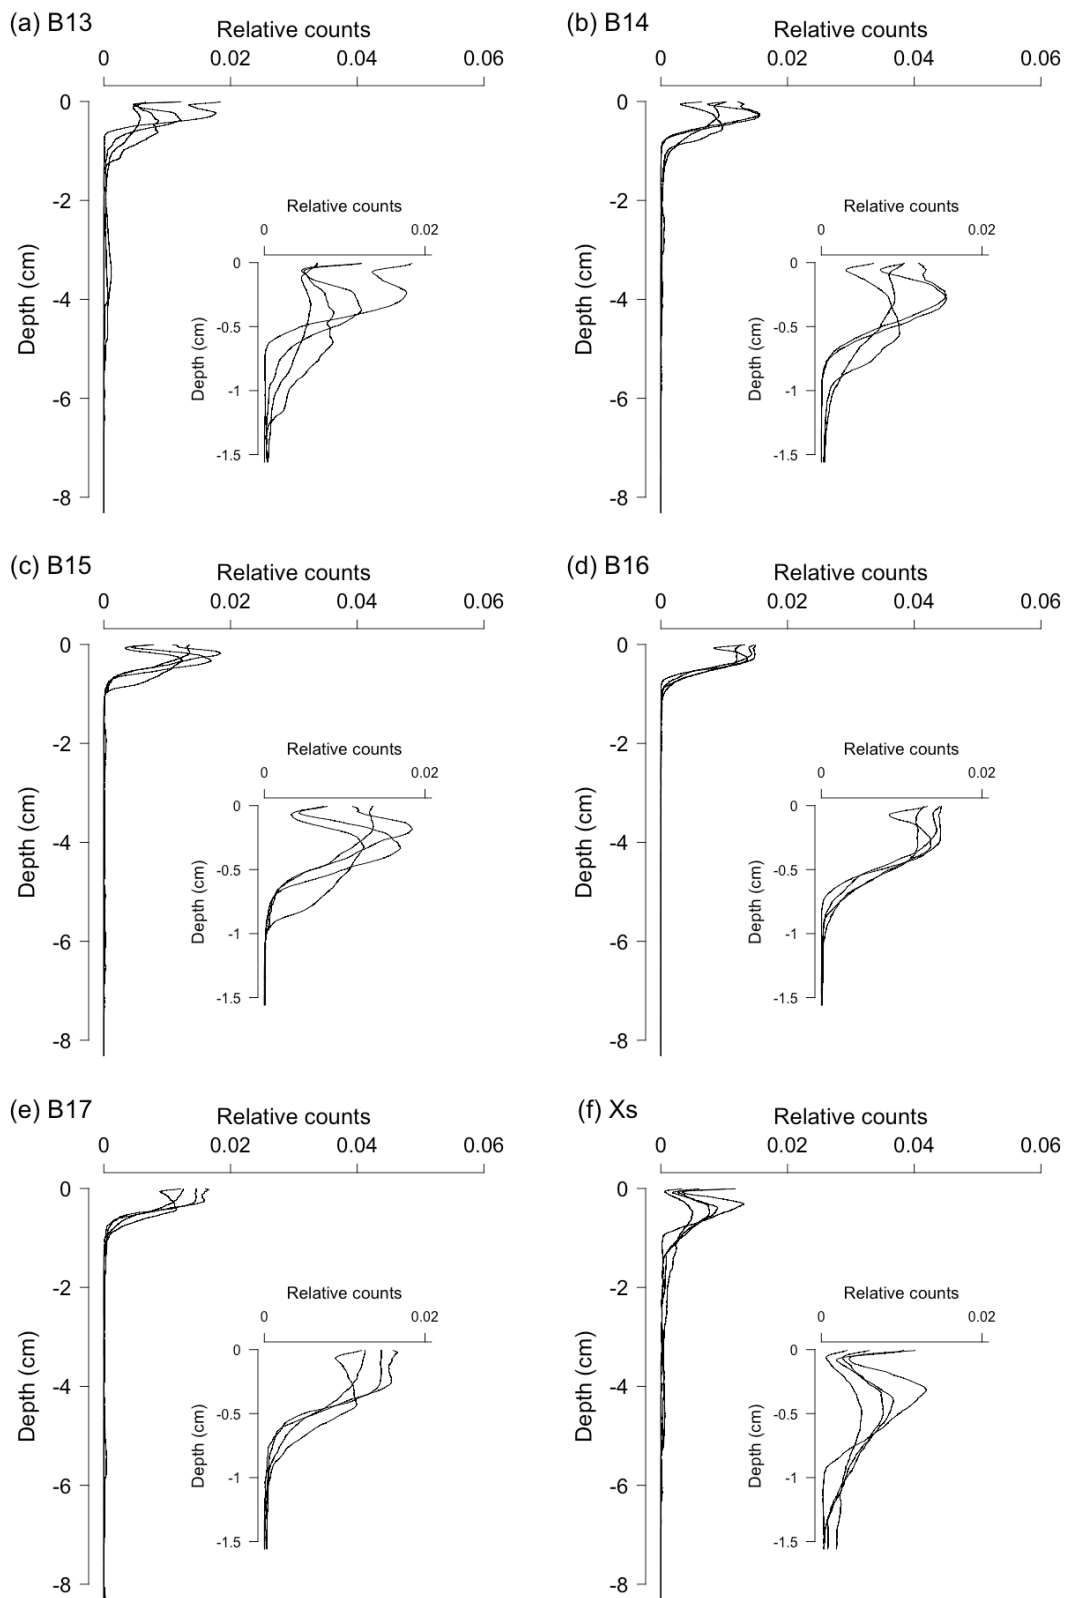

**Figure S13:** Cumulative sediment particle size distributions ( $n = 4$ ) for stations (a) B13, (b) B14, (c) B15, (d) B16, and (e) B17 in 2017.

(a) B13

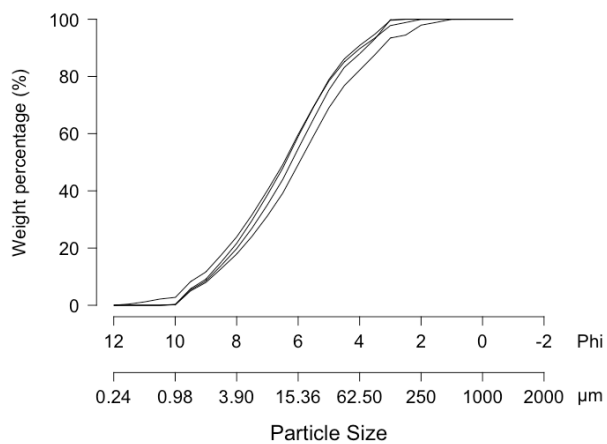

(b) B14

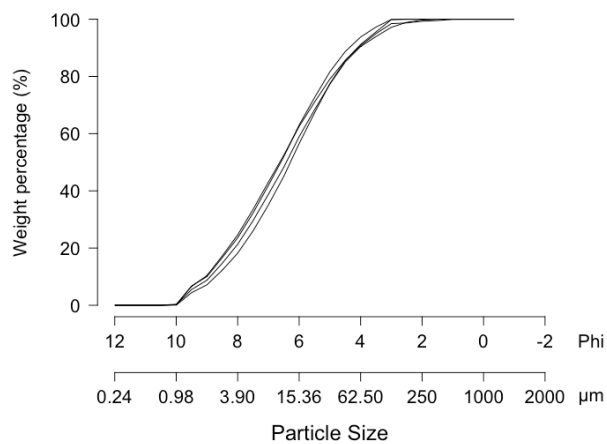

(c) B15

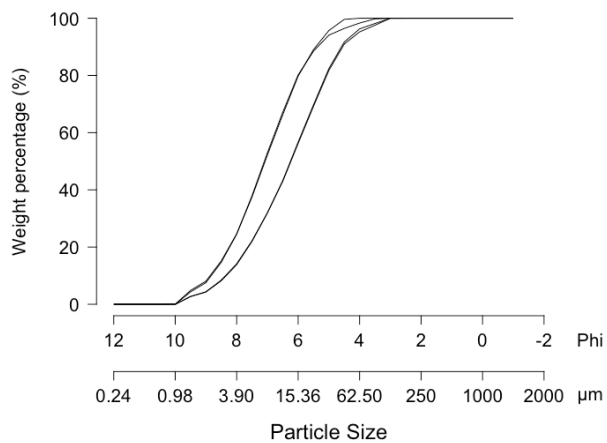

(d) B16

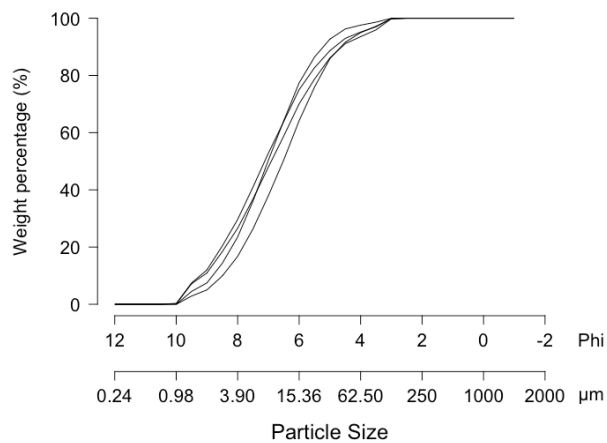

(e) B17

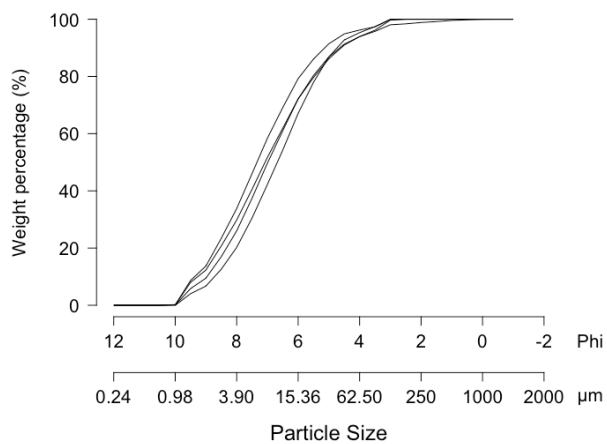

**Figure S14:** Cumulative sediment particle size distributions (n = 4) for stations (a) B13, (b) B14, (c) B15, (d) B16, (e) B17 and (f) Xs in 2018.

(a) B13

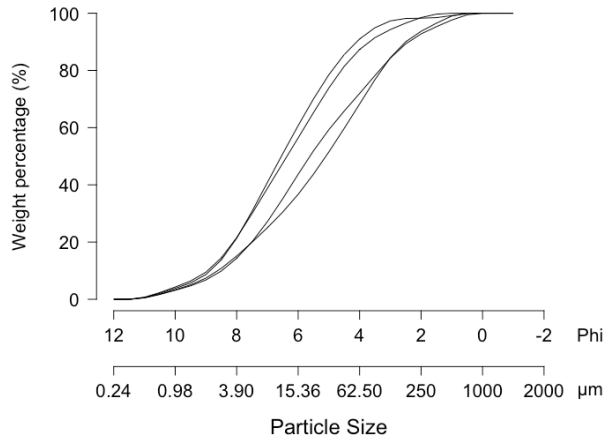

(b) B14

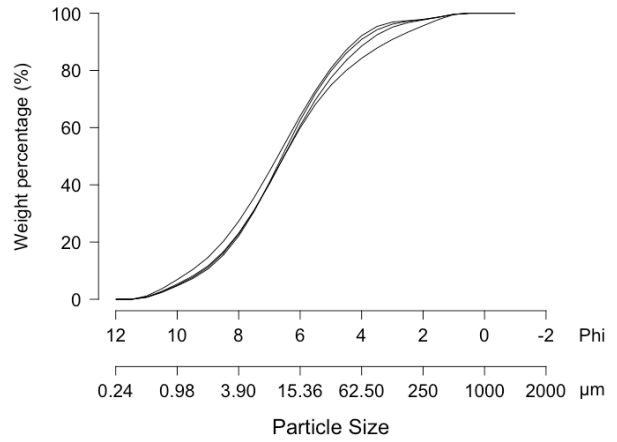

(c) B15

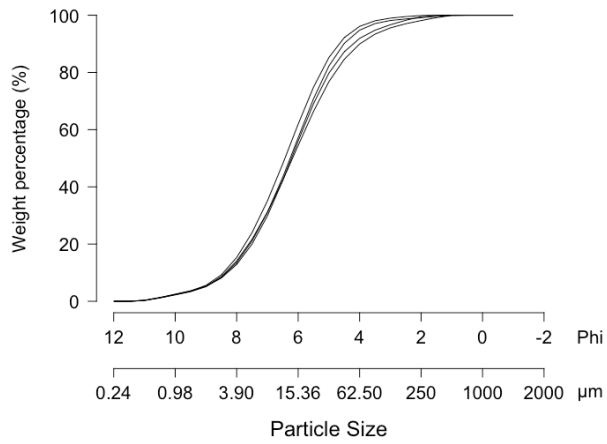

(d) B16

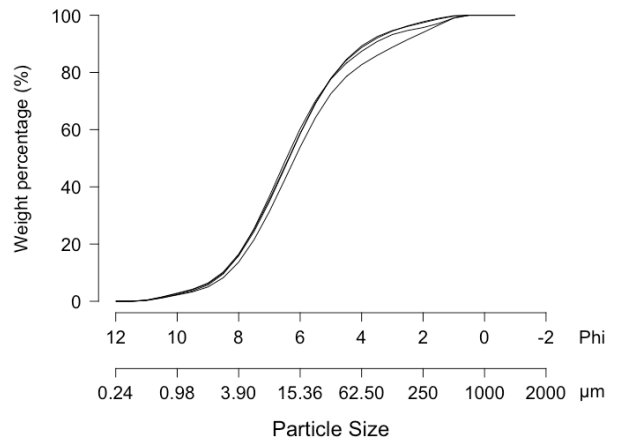

(e) B17

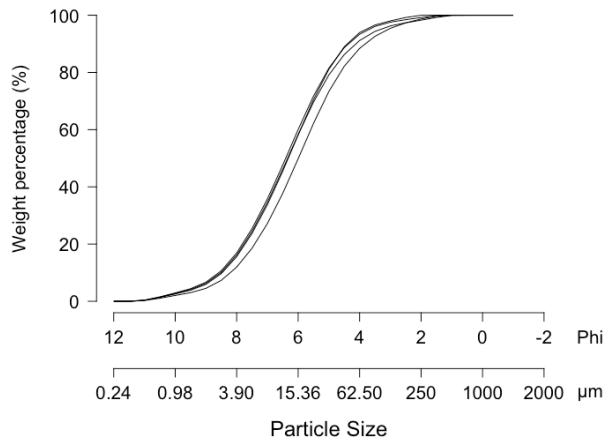

(f) Xs

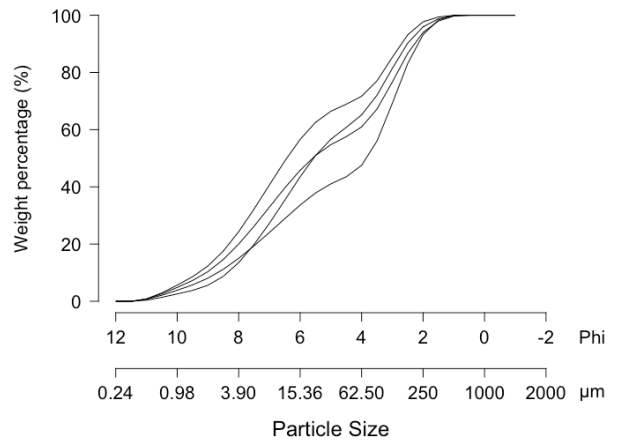

**Table S3:** Summary of sediment particle size statistics for each replicate core (retrieved as per Figure S3) given by the default GRADISTAT output (Blott & Pye, 2001). Mean, sorting, skewness, kurtosis, the percentage of sample less than 63  $\mu\text{m}$  and total organic material are presented for all stations in (a) 2017 and (b) 2018. Superscripts provide descriptive terminology as outlined by Blott & Pye (2001). **Mean,  $\bar{x}$ :** fs, fine silt; ms, medium silt; cs, coarse silt; vcs, very coarse silt. **Sorting,  $\sigma$ :** ps, poorly sorted; vps, very poorly sorted. **Skewness,  $Sk$ :** sy, symmetrical; vfsk, very fine skewed; fsk, fine skewed; csk, coarse skewed. **Kurtosis,  $K$ :** mk, mesokurtic; lk, leptokurtic; pk, platykurtic. Organic material is by loss on ignition.

(a)

| Station         | Event number | Mean ( $\bar{x}$ , $\mu\text{m}$ ) | Sorting ( $\sigma$ , $\mu\text{m}$ ) | Skewness ( $Sk$ , $\mu\text{m}$ ) | Kurtosis ( $K$ , $\mu\text{m}$ ) | Sample <63 $\mu\text{m}$ (%) | Organic material (%) | Sediment name               |
|-----------------|--------------|------------------------------------|--------------------------------------|-----------------------------------|----------------------------------|------------------------------|----------------------|-----------------------------|
| <b>JCR16006</b> |              |                                    |                                      |                                   |                                  |                              |                      |                             |
| B13             | 331          | 22.27 <sup>ms</sup>                | 27.28 <sup>ps</sup>                  | 2.080 <sup>sy</sup>               | 7.131 <sup>mk</sup>              | 90.902                       | 6.777                | Medium silt                 |
| B13             | 332          | 24.47 <sup>ms</sup>                | 35.53 <sup>ps</sup>                  | 2.993 <sup>sy</sup>               | 14.17 <sup>mk</sup>              | 89.783                       | 7.205                | Very fine sandy medium silt |
| B13             | 333          | 40.47 <sup>cs</sup>                | 66.83 <sup>vps</sup>                 | 3.426 <sup>sy</sup>               | 17.12 <sup>mk</sup>              | 82.298                       | 6.229                | Very fine sandy coarse silt |
| B13             | 334          | 25.12 <sup>ms</sup>                | 29.33 <sup>ps</sup>                  | 1.743 <sup>sy</sup>               | 5.276 <sup>mk</sup>              | 88.010                       | 6.748                | Very fine sandy coarse silt |
| B14             | 318          | 24.07 <sup>ms</sup>                | 42.88 <sup>ps</sup>                  | 5.599 <sup>sy</sup>               | 46.73 <sup>mk</sup>              | 90.859                       | 7.883                | Medium silt                 |
| B14             | 319          | 25.05 <sup>ms</sup>                | 36.85 <sup>ps</sup>                  | 3.373 <sup>sy</sup>               | 18.09 <sup>mk</sup>              | 90.544                       | 7.769                | Medium silt                 |
| B14             | 320          | 22.78 <sup>ms</sup>                | 26.00 <sup>ps</sup>                  | 1.938 <sup>sy</sup>               | 6.512 <sup>mk</sup>              | 91.295                       | 8.305                | Medium silt                 |
| B14             | 321          | 19.17 <sup>ms</sup>                | 23.04 <sup>ps</sup>                  | 2.173 <sup>sy</sup>               | 7.963 <sup>mk</sup>              | 93.866                       | 8.354                | Medium silt                 |
| B15             | 286          | 11.61 <sup>fs</sup>                | 13.40 <sup>ps</sup>                  | 3.240 <sup>sy</sup>               | 16.93 <sup>mk</sup>              | 98.361                       | 5.979                | Fine silt                   |
| B15             | 287          | 10.52 <sup>fs</sup>                | 9.177 <sup>ps</sup>                  | 1.644 <sup>sy</sup>               | 5.819 <sup>mk</sup>              | 100.00                       | 7.057                | Fine silt                   |
| B15             | 288          | 19.43 <sup>ms</sup>                | 19.58 <sup>ps</sup>                  | 2.288 <sup>fsk</sup>              | 9.670 <sup>mk</sup>              | 96.329                       | 7.413                | Coarse silt                 |
| B15             | 289          | 20.09 <sup>ms</sup>                | 20.88 <sup>ps</sup>                  | 2.252 <sup>sy</sup>               | 8.854 <sup>mk</sup>              | 95.281                       | 7.486                | Coarse silt                 |
| B16             | 200          | 14.98 <sup>fs</sup>                | 21.53 <sup>ps</sup>                  | 2.965 <sup>sy</sup>               | 12.34 <sup>mk</sup>              | 95.196                       | 7.057                | Fine silt                   |
| B16             | 201          | 17.34 <sup>ms</sup>                | 24.04 <sup>ps</sup>                  | 2.629 <sup>sy</sup>               | 9.934 <sup>mk</sup>              | 93.603                       | 7.000                | Medium silt                 |
| B16             | 203          | 12.87 <sup>fs</sup>                | 16.27 <sup>ps</sup>                  | 3.610 <sup>sy</sup>               | 19.15 <sup>mk</sup>              | 97.598                       | 7.077                | Medium silt                 |
| B16             | 205          | 18.25 <sup>ms</sup>                | 21.76 <sup>ps</sup>                  | 2.730 <sup>sy</sup>               | 11.62 <sup>mk</sup>              | 95.033                       | 7.713                | Medium silt                 |
| B17             | 227          | 16.99 <sup>ms</sup>                | 20.86 <sup>ps</sup>                  | 2.745 <sup>sy</sup>               | 11.48 <sup>mk</sup>              | 95.347                       | 7.292                | Medium silt                 |
| B17             | 228          | 22.11 <sup>ms</sup>                | 63.42 <sup>ps</sup>                  | 9.544 <sup>sy</sup>               | 121.8 <sup>mk</sup>              | 93.967                       | 6.960                | Fine silt                   |
| B17             | 229          | 16.70 <sup>fs</sup>                | 24.12 <sup>ps</sup>                  | 2.732 <sup>sy</sup>               | 10.77 <sup>mk</sup>              | 93.975                       | 6.739                | Fine silt                   |
| B17             | 230          | 12.97 <sup>fs</sup>                | 19.82 <sup>ps</sup>                  | 3.434 <sup>sy</sup>               | 15.86 <sup>mk</sup>              | 96.231                       | 5.926                | Fine silt                   |



(b)

| Station         | Event number | Mean ( $\bar{x}$ , $\mu\text{m}$ ) | Sorting ( $\sigma$ , $\mu\text{m}$ ) | Skewness (Sk, $\mu\text{m}$ ) | Kurtosis (K, $\mu\text{m}$ ) | Sample <63 $\mu\text{m}$ (%) | Organic material (%) | Sediment name                    |
|-----------------|--------------|------------------------------------|--------------------------------------|-------------------------------|------------------------------|------------------------------|----------------------|----------------------------------|
| <b>JCR17007</b> |              |                                    |                                      |                               |                              |                              |                      |                                  |
| B13             | 289          | 71.71 <sup>cs</sup>                | 127.9 <sup>vps</sup>                 | 3.302 <sup>sy</sup>           | 15.83 <sup>mk</sup>          | 72.101                       | 6.741                | Very fine sandy medium silt      |
| B13             | 291          | 29.38 <sup>ms</sup>                | 72.17 <sup>ps</sup>                  | 6.785 <sup>sy</sup>           | 56.59 <sup>mk</sup>          | 91.109                       | 6.965                | Medium silt                      |
| B13             | 292          | 69.21 <sup>cs</sup>                | 103.2 <sup>vps</sup>                 | 2.745 <sup>fsk</sup>          | 11.54 <sup>mk</sup>          | 68.472                       | 6.599                | Very fine sandy very coarse silt |
| B13             | 293          | 32.08 <sup>ms</sup>                | 54.85 <sup>vps</sup>                 | 3.622 <sup>sy</sup>           | 19.08 <sup>mk</sup>          | 87.455                       | 6.747                | Very fine sandy medium silt      |
| B14             | 237          | 32.26 <sup>ms</sup>                | 68.92 <sup>vps</sup>                 | 4.915 <sup>sy</sup>           | 31.73 <sup>mk</sup>          | 88.623                       | 7.331                | Very fine sandy medium silt      |
| B14             | 238          | 29.24 <sup>ms</sup>                | 65.98 <sup>ps</sup>                  | 5.474 <sup>sy</sup>           | 38.01 <sup>mk</sup>          | 90.956                       | 7.860                | Medium silt                      |
| B14             | 239          | 42.56 <sup>ms</sup>                | 86.35 <sup>vps</sup>                 | 3.551 <sup>csk</sup>          | 17.04 <sup>lk</sup>          | 84.337                       | 7.329                | Very fine sandy medium silt      |
| B14             | 240          | 27.27 <sup>ms</sup>                | 65.03 <sup>vps</sup>                 | 5.785 <sup>sy</sup>           | 41.38 <sup>mk</sup>          | 92.235                       | 7.367                | Medium silt                      |
| Xs              | 270          | 74.16 <sup>cs</sup>                | 98.00 <sup>vps</sup>                 | 1.860 <sup>sy</sup>           | 7.039 <sup>pk</sup>          | 61.053                       | 4.232                | Fine sandy fine silt             |
| Xs              | 271          | 92.26 <sup>vcs</sup>               | 96.04 <sup>vps</sup>                 | 1.238 <sup>vfsk</sup>         | 4.456 <sup>pk</sup>          | 47.666                       | 4.469                | Medium silty fine sands          |
| Xs              | 272          | 49.97 <sup>ms</sup>                | 74.33 <sup>vps</sup>                 | 2.169 <sup>csk</sup>          | 8.796 <sup>pk</sup>          | 71.755                       | 4.488                | Very fine sandy fine silt        |
| Xs              | 273          | 64.38 <sup>cs</sup>                | 84.72 <sup>vps</sup>                 | 2.002 <sup>sy</sup>           | 7.744 <sup>pk</sup>          | 65.287                       | 5.111                | Very fine sandy medium silt      |
| B15             | 205          | 23.29 <sup>ms</sup>                | 41.62 <sup>ps</sup>                  | 6.901 <sup>sy</sup>           | 65.19 <sup>mk</sup>          | 94.847                       | 6.476                | Medium silt                      |
| B15             | 206          | 25.75 <sup>ms</sup>                | 39.47 <sup>ps</sup>                  | 4.095 <sup>sy</sup>           | 24.40 <sup>lk</sup>          | 91.985                       | 6.541                | Medium silt                      |
| B15             | 207          | 18.88 <sup>ms</sup>                | 24.91 <sup>ps</sup>                  | 4.749 <sup>sy</sup>           | 37.04 <sup>mk</sup>          | 96.165                       | 6.659                | Medium silt                      |
| B15             | 208          | 31.11 <sup>ms</sup>                | 57.70 <sup>ps</sup>                  | 4.758 <sup>sy</sup>           | 30.58 <sup>mk</sup>          | 90.037                       | 6.800                | Very fine sandy medium silt      |
| B16             | 189          | 33.29 <sup>ms</sup>                | 69.49 <sup>ps</sup>                  | 4.736 <sup>sy</sup>           | 29.43 <sup>lk</sup>          | 89.361                       | 5.643                | Very fine sandy medium silt      |
| B16             | 190          | 32.66 <sup>ms</sup>                | 64.63 <sup>ps</sup>                  | 4.509 <sup>sy</sup>           | 27.51 <sup>lk</sup>          | 88.799                       | 6.229                | Very fine sandy medium silt      |
| B16             | 191          | 51.71 <sup>cs</sup>                | 102.0 <sup>vps</sup>                 | 3.276 <sup>csk</sup>          | 14.27 <sup>lk</sup>          | 82.795                       | 6.231                | Very fine sandy medium silt      |
| B16             | 192          | 40.31 <sup>ms</sup>                | 91.13 <sup>ps</sup>                  | 4.174 <sup>csk</sup>          | 21.56 <sup>lk</sup>          | 87.475                       | 6.024                | Very fine sandy medium silt      |
| B17             | 134          | 28.46 <sup>ms</sup>                | 55.14 <sup>ps</sup>                  | 5.079 <sup>sy</sup>           | 34.27 <sup>mk</sup>          | 91.254                       | 6.250                | Medium silt                      |
| B17             | 135          | 22.01 <sup>ms</sup>                | 29.75 <sup>ps</sup>                  | 3.682 <sup>sy</sup>           | 20.59 <sup>mk</sup>          | 94.024                       | 6.101                | Medium silt                      |
| B17             | 136          | 23.49 <sup>ms</sup>                | 40.14 <sup>ps</sup>                  | 5.252 <sup>sy</sup>           | 39.00 <sup>mk</sup>          | 93.434                       | 6.209                | Medium silt                      |
| B17             | 137          | 32.07 <sup>ms</sup>                | 50.59 <sup>ps</sup>                  | 4.045 <sup>sy</sup>           | 23.70 <sup>mk</sup>          | 88.540                       | 6.271                | Very fine sandy coarse silt      |

**Table S4:** Summary of mean ( $\pm$  SD) community parameters (SR, species richness; J, evenness; TA, total abundance; TB, total biomass (g) aquarium<sup>-1</sup> for (a) all stations by year and (b) based on the collated dataset, with summed totals provided in square brackets. Total biomass includes taxon specific debris. SR is based on the returns for biomass and J is based on the returns for abundance.

| (a)           | 2017  |                  |                  |                 |                   | 2018             |                  |                  |                   |                  |                   |                  |
|---------------|-------|------------------|------------------|-----------------|-------------------|------------------|------------------|------------------|-------------------|------------------|-------------------|------------------|
|               | n = 4 | B13              | B14              | B15             | B16               | B17              | B13              | B14              | Xs                | B15              | B16               | B17              |
| <b>SR</b>     |       | 12.00<br>(5.23)  | 16.25<br>(2.63)  | 14.25<br>(2.63) | 33.25<br>(4.03)   | 23.75<br>(3.95)  | 12.00<br>(6.38)  | 12.00<br>(2.16)  | 17.50<br>(9.85)   | 16.00<br>(6.00)  | 19.25<br>(9.74)   | 22.75<br>(8.42)  |
| <b>J</b>      |       | 0.88<br>(0.14)   | 0.65<br>(0.08)   | 0.93<br>(0.02)  | 0.75<br>(0.07)    | 0.84<br>(0.05)   | 0.72<br>(0.18)   | 0.53<br>(0.16)   | 0.53<br>(0.21)    | 0.91<br>(0.03)   | 0.79<br>(0.05)    | 0.79<br>(0.07)   |
| <b>TA</b>     |       | 18.75<br>(10.87) | 49.00<br>(11.46) | 23.50<br>(6.61) | 148.75<br>(38.11) | 98.25<br>(20.61) | 32.25<br>(21.23) | 49.00<br>(21.24) | 100.75<br>(60.79) | 29.25<br>(12.50) | 100.75<br>(36.75) | 88.00<br>(41.35) |
| <b>TB (g)</b> |       | 0.99<br>(0.68)   | 1.32<br>(0.86)   | 0.15<br>(0.04)  | 2.86<br>(1.79)    | 0.39<br>(0.26)   | 1.30<br>(1.34)   | 0.61<br>(0.21)   | 1.10<br>(0.54)    | 0.18<br>(0.02)   | 0.75<br>(0.20)    | 1.12<br>(0.78)   |

| (b)                         | 2017+2018                 |                           |                            |                          |                            |                           |             |
|-----------------------------|---------------------------|---------------------------|----------------------------|--------------------------|----------------------------|---------------------------|-------------|
| B13-B17, n = 8<br>Xs, n = 4 | B13                       | B14                       | Xs                         | B15                      | B16                        | B17                       | Grand total |
| <b>SR</b>                   | 12.00<br>(5.40)<br>[54]   | 14.13<br>(3.18)<br>[51]   | 17.50<br>(9.85)<br>[45]    | 15.13<br>(4.39)<br>[59]  | 26.25<br>(10.18)<br>[85]   | 23.25<br>(6.11)<br>[74]   | 157         |
| <b>J</b>                    | 0.80<br>(0.17)<br>[-]     | 0.59<br>(0.13)<br>[-]     | 0.53<br>(0.21)<br>[-]      | 0.92<br>(0.03)<br>[-]    | 0.77<br>(0.06)<br>[-]      | 0.82<br>(0.06)<br>[-]     | -           |
| <b>TA</b>                   | 25.50<br>(17.20)<br>[204] | 49.00<br>(15.80)<br>[392] | 100.75<br>(60.79)<br>[403] | 26.38<br>(9.75)<br>[211] | 124.75<br>(43.12)<br>[998] | 93.13<br>(30.74)<br>[745] | 2953        |
| <b>TB (g)</b>               | 1.15<br>(0.99)<br>[9.17]  | 0.96<br>(0.69)<br>[7.69]  | 1.10<br>(0.54)<br>[4.39]   | 0.17<br>(0.04)<br>[1.32] | 1.81<br>(1.63)<br>[14.46]  | 0.76<br>(0.66)<br>[6.05]  | 43.0935     |

**Figure S15:** Summary of diagnostics for ordination showing (a-b) group polygons by station, (c,d) Shepard goodness of fit ( $R^2$ ) between dissimilarities and fitted distances, and (e,f) goodness of fit measure for individual observations within the visualization based on faunal (a,c,e) abundance and (b,d,f) biomass.

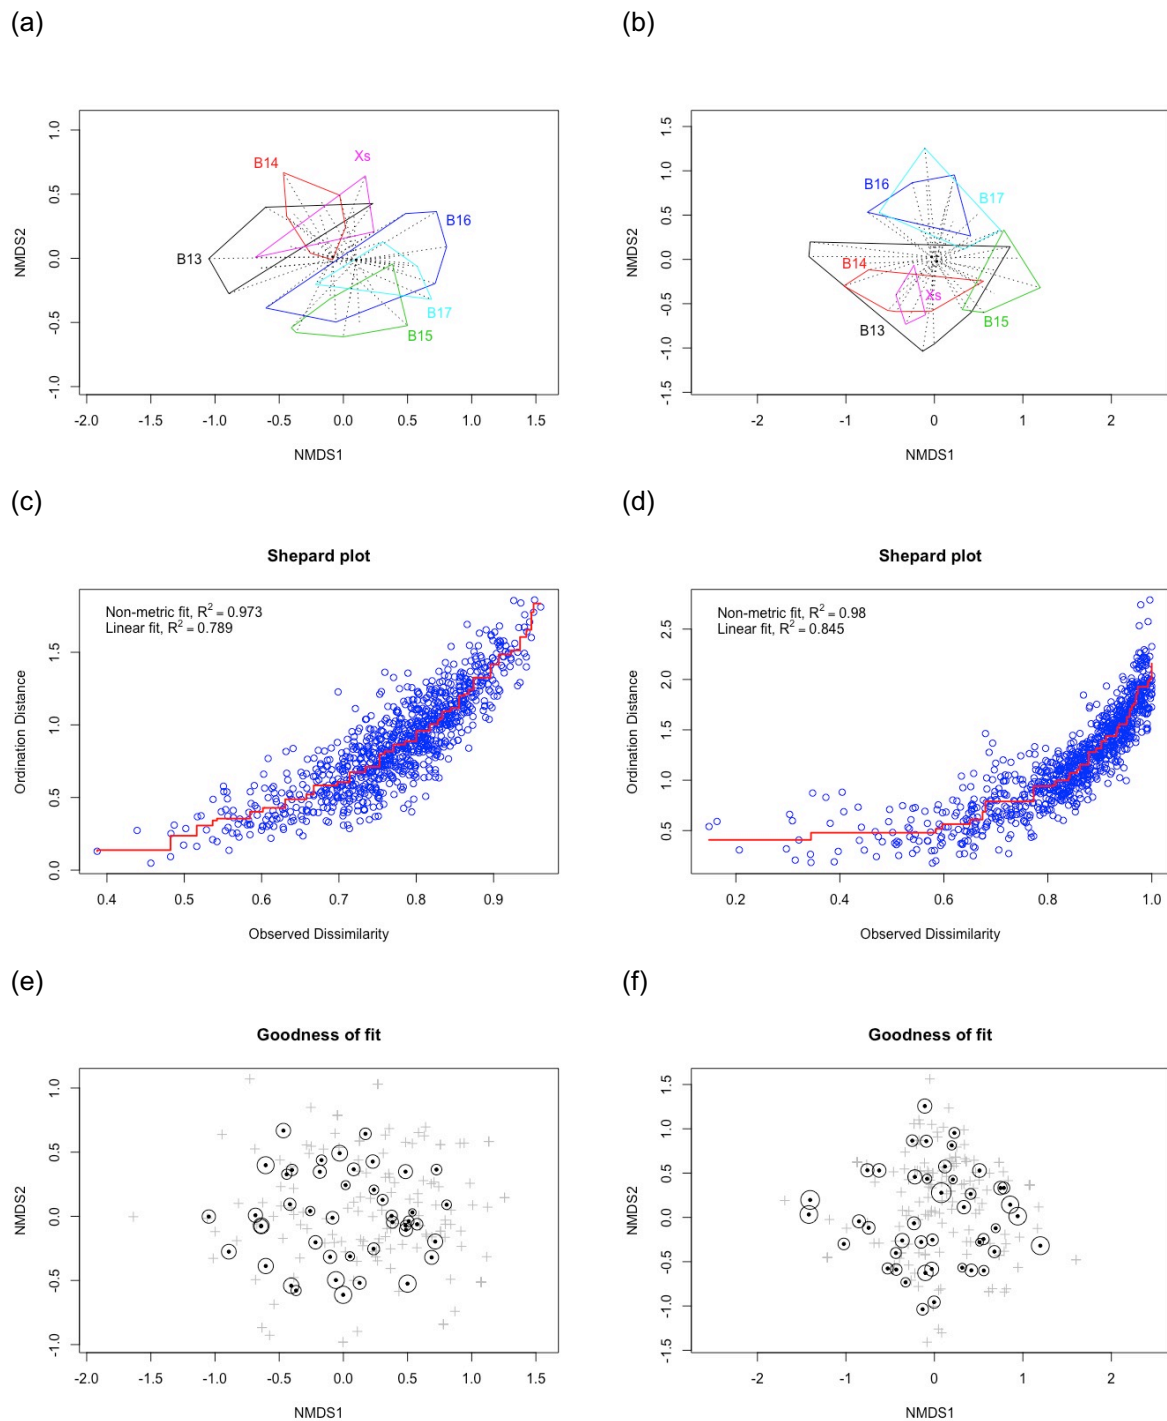

**Table S5:** Summary of the species (or higher taxa) that collectively contribute approximately half of the contribution to overall dissimilarity ( $\sum S_i \sim 50\%$ , indicated for each pairwise contrast) between stations based on (a) abundance and (b) biomass with taxa listed in rank order (most to least) of average contribution to dissimilarity. Font colour indicates a positive (green) versus negative (red) directional change in (a) mean abundance or (b) mean biomass representation between each station pair (row relative to column, i.e. green indicates  $y > x$ , red indicates  $y < x$ ).

| (a)        | B13                                                                                                                                                                                                                                                                                                                                                                                                        | B14                                                                                                                                                                                                                                                                                                                                                                                                    | Xs                                                                                                                                                                                                                             | B15 | B16 |
|------------|------------------------------------------------------------------------------------------------------------------------------------------------------------------------------------------------------------------------------------------------------------------------------------------------------------------------------------------------------------------------------------------------------------|--------------------------------------------------------------------------------------------------------------------------------------------------------------------------------------------------------------------------------------------------------------------------------------------------------------------------------------------------------------------------------------------------------|--------------------------------------------------------------------------------------------------------------------------------------------------------------------------------------------------------------------------------|-----|-----|
| <b>B14</b> | <i>Spiochaetopterus typicus</i><br><i>Lumbrineris mixochaeta</i><br><i>Maldane sarsi</i><br>Nemertea<br><i>Nephtys incisa</i><br><i>Spiophanes kroyeri</i><br><i>Haploops tubicola</i><br><i>Ctenodiscus crispatus</i><br><i>Chaetozone setosa</i><br><i>Scutopus ventrolineatus</i><br>Yoldiidae<br><i>Adontorhina</i> juv.<br><i>Antalis entalis</i><br><i>Nephasoma procera</i><br>Nematoda<br>(51.65%) | -                                                                                                                                                                                                                                                                                                                                                                                                      |                                                                                                                                                                                                                                |     |     |
| <b>Xs</b>  | <i>Spiochaetopterus typicus</i><br>Yoldiidae<br><i>Lumbrineris mixochaeta</i><br><i>Owenia polaris</i><br><i>Adontorhina</i> juv.<br><i>Spiophanes kroyeri</i><br><i>Chaetozone setosa</i><br><i>Levinsenia gracillis</i><br><i>Leitoscoloplos mammosus</i><br><i>Ctenodiscus crispatus</i><br><i>Maldane sarsi</i><br>(50.41%)                                                                            | Yoldiidae<br><i>Spiochaetopterus typicus</i><br><i>Owenia polaris</i><br><i>Maldane sarsi</i><br><i>Adontorhina</i> juv.<br><i>Spiophanes kroyeri</i><br><i>Lumbrineris mixochaeta</i><br><i>Leitoscoloplos mammosus</i><br>Nemertea<br><i>Nephtys incisa</i><br><i>Levinsenia gracillis</i><br><i>Scutopus ventrolineatus</i><br><i>Ctenodiscus crispatus</i><br><i>Nephasoma procera</i><br>(52.02%) | -                                                                                                                                                                                                                              |     |     |
| <b>B15</b> | <i>Spiochaetopterus typicus</i><br><i>Spiophanes kroyeri</i><br><i>Maldane sarsi</i><br><i>Nephasoma procera</i><br>Nematoda<br>Yoldiidae<br><i>Abyssoninoe hibernica</i><br><i>Lumbrineris mixochaeta</i><br><i>Haploops tubicola</i>                                                                                                                                                                     | <i>Spiochaetopterus typicus</i><br><i>Spiophanes kroyeri</i><br>Nematoda<br><i>Lumbrineris mixochaeta</i><br><i>Nephasoma procera</i><br>Yoldiidae<br>Nemertea<br><i>Nephtys incisa</i><br><i>Maldane sarsi</i>                                                                                                                                                                                        | <i>Spiochaetopterus typicus</i><br>Yoldiidae<br><i>Spiophanes kroyeri</i><br><i>Maldane sarsi</i><br><i>Owenia polaris</i><br>Nematoda<br><i>Lumbrineris mixochaeta</i><br><i>Nephasoma procera</i><br><i>Adontorhina</i> juv. | -   |     |

|            |                                                                                                                                                                                                                                                                                                                                              |                                                                                                                                                                                                                                                                                                                                              |                                                                                                                                                                                                                                                                                                    |                                                                                                                                                                                                                                                                                                                                                                                                                                              |                                                                                                                                                                                                                                                                                                                                                                                                                                                                                                 |
|------------|----------------------------------------------------------------------------------------------------------------------------------------------------------------------------------------------------------------------------------------------------------------------------------------------------------------------------------------------|----------------------------------------------------------------------------------------------------------------------------------------------------------------------------------------------------------------------------------------------------------------------------------------------------------------------------------------------|----------------------------------------------------------------------------------------------------------------------------------------------------------------------------------------------------------------------------------------------------------------------------------------------------|----------------------------------------------------------------------------------------------------------------------------------------------------------------------------------------------------------------------------------------------------------------------------------------------------------------------------------------------------------------------------------------------------------------------------------------------|-------------------------------------------------------------------------------------------------------------------------------------------------------------------------------------------------------------------------------------------------------------------------------------------------------------------------------------------------------------------------------------------------------------------------------------------------------------------------------------------------|
|            | <i>Chaetozone setosa</i><br><i>Ophelina abranchiata</i><br><i>Mediomastus fragilis</i><br><i>Nephtys incisa</i><br><i>Ctenodiscus crispatus</i><br>(50.84%)                                                                                                                                                                                  | <i>Abyssoninoe hibernica</i><br><i>Ctenodiscus crispatus</i><br><i>Scutopus ventrolineatus</i><br><i>Haploops tubicola</i><br>(51.62%)                                                                                                                                                                                                       | <i>Leitoscoloplos mammosus</i><br><i>Abyssoninoe hibernica</i><br>(51.98%)                                                                                                                                                                                                                         |                                                                                                                                                                                                                                                                                                                                                                                                                                              |                                                                                                                                                                                                                                                                                                                                                                                                                                                                                                 |
| <b>B16</b> | <i>Maldane sarsi</i><br>Yoldiidae<br><i>Spiochaetopterus typicus</i><br><i>Chirimia biceps</i><br><i>Nephasoma procera</i><br><i>Spiophanes kroyeri</i><br><i>Haploops tubicola</i><br><i>Lumbrineris mixochaeta</i><br>Nematoda<br><i>Leitoscoloplos mammosus</i><br><i>Mediomastus fragilis</i><br><i>Levinsenia gracillis</i><br>(51.67%) | <i>Maldane sarsi</i><br><i>Spiochaetopterus typicus</i><br>Yoldiidae<br><i>Chirimia biceps</i><br><i>Haploops tubicola</i><br><i>Nephasoma procera</i><br><i>Spiophanes kroyeri</i><br>Nematoda<br><i>Leitoscoloplos mammosus</i><br><i>Lumbrineris mixochaeta</i><br><i>Levinsenia gracillis</i><br><i>Mediomastus fragilis</i><br>(51.59%) | <i>Spiochaetopterus typicus</i><br><i>Maldane sarsi</i><br>Yoldiidae<br><i>Chirimia biceps</i><br><i>Haploops tubicola</i><br><i>Spiophanes kroyeri</i><br><i>Nephasoma procera</i><br><i>Owenia polaris</i><br><i>Adontorhina</i> juv.<br>Nematoda<br><i>Lumbrineris mixochaeta</i><br>(50.54%)   | <i>Maldane sarsi</i><br>Yoldiidae<br><i>Chirimia biceps</i><br><i>Haploops tubicola</i><br><i>Spiophanes kroyeri</i><br><i>Lumbrineris mixochaeta</i><br><i>Nephasoma procera</i><br><i>Leitoscoloplos mammosus</i><br>Nematoda<br><i>Spiochaetopterus typicus</i><br><i>Mediomastus fragilis</i><br><i>Levinsenia gracillis</i><br><i>Chaetozone setosa</i><br><i>Glyphanostomum pallescens</i><br><i>Abyssoninoe hibernica</i><br>(51.14%) |                                                                                                                                                                                                                                                                                                                                                                                                                                                                                                 |
| <b>B17</b> | <i>Nephasoma procera</i><br><i>Maldane sarsi</i><br><i>Spiochaetopterus typicus</i><br><i>Adontorhina</i> juv.<br><i>Lumbrineris mixochaeta</i><br><i>Leitoscoloplos mammosus</i><br>Nematoda<br><i>Thyasira equalis</i><br><i>Chirimia biceps</i><br><i>Mediomastus fragilis</i><br>Yoldiidae<br><i>Ophelina abranchiata</i><br>(51.52%)    | <i>Spiochaetopterus typicus</i><br><i>Nephasoma procera</i><br><i>Maldane sarsi</i><br><i>Adontorhina</i> juv.<br><i>Leitoscoloplos mammosus</i><br>Nematoda<br><i>Thyasira equalis</i><br><i>Chirimia biceps</i><br><i>Mediomastus fragilis</i><br>Yoldiidae<br><i>Ophelina abranchiata</i><br>(50.01%)                                     | <i>Spiochaetopterus typicus</i><br><i>Nephasoma procera</i><br><i>Maldane sarsi</i><br><i>Adontorhina</i> juv.<br>Yoldiidae<br>Nematoda<br><i>Owenia polaris</i><br><i>Thyasira equalis</i><br><i>Chirimia biceps</i><br><i>Mediomastus fragilis</i><br><i>Leitoscoloplos mammosus</i><br>(50.21%) | <i>Nephasoma procera</i><br><i>Adontorhina</i> juv.<br><i>Leitoscoloplos mammosus</i><br><i>Maldane sarsi</i><br><i>Lumbrineris mixochaeta</i><br><i>Spiophanes kroyeri</i><br><i>Thyasira equalis</i><br><i>Chirimia biceps</i><br><i>Mediomastus fragilis</i><br><i>Spiochaetopterus typicus</i><br>Nematoda<br>Yoldiidae<br><i>Ophelina abranchiata</i><br><i>Chaetozone setosa</i><br>(50.07%)                                           | Yoldiidae<br><i>Maldane sarsi</i><br><i>Adontorhina</i> juv.<br><i>Haploops tubicola</i><br><i>Nephasoma procera</i><br><i>Spiophanes kroyeri</i><br><i>Chirimia biceps</i><br>Nematoda<br><i>Mediomastus fragilis</i><br><i>Thyasira equalis</i><br><i>Ophelina abranchiata</i><br><i>Lumbrineris mixochaeta</i><br><i>Levinsenia gracillis</i><br><i>Leitoscoloplos mammosus</i><br><i>Chaetozone setosa</i><br><i>Heteromastus filiformis</i><br><i>Spiochaetopterus typicus</i><br>(50.67%) |

| (b)        | B13                                                                                                                                                                     | B14                                                                                                                                                            | Xs                                                                                                                                     | B15                                                                                                                                                                                                                | B16                                                                                                                                                         |
|------------|-------------------------------------------------------------------------------------------------------------------------------------------------------------------------|----------------------------------------------------------------------------------------------------------------------------------------------------------------|----------------------------------------------------------------------------------------------------------------------------------------|--------------------------------------------------------------------------------------------------------------------------------------------------------------------------------------------------------------------|-------------------------------------------------------------------------------------------------------------------------------------------------------------|
| <b>B14</b> | <i>Ctenodiscus crispatus</i><br><i>Spiochaetopterus typicus</i><br><i>Batharca glacialis</i><br>(56.07%)                                                                | -                                                                                                                                                              |                                                                                                                                        |                                                                                                                                                                                                                    |                                                                                                                                                             |
| <b>Xs</b>  | <i>Ctenodiscus crispatus</i><br><i>Spiochaetopterus typicus</i><br><i>Nephtys incisa</i><br>(54.69%)                                                                    | <i>Spiochaetopterus typicus</i><br><i>Ctenodiscus crispatus</i><br><i>Nephtys incisa</i><br><i>Aglaophamus malmgreni</i><br>(54.85%)                           | -                                                                                                                                      |                                                                                                                                                                                                                    |                                                                                                                                                             |
| <b>B15</b> | <i>Ctenodiscus crispatus</i><br><i>Spiochaetopterus typicus</i><br><i>Batharca glacialis</i><br>(50.56%)                                                                | <i>Spiochaetopterus typicus</i><br><i>Ctenodiscus crispatus</i><br><i>Astarte crenata</i> agg<br>(55.27%)                                                      | <i>Spiochaetopterus typicus</i><br><i>Nephtys incisa</i><br><i>Aglaophamus malmgreni</i><br>(56.57%)                                   | -                                                                                                                                                                                                                  |                                                                                                                                                             |
| <b>B16</b> | <i>Ctenodiscus crispatus</i><br><i>Astarte crenata</i> agg<br><i>Maldane sarsi</i><br><i>Chirimia biceps</i><br>(56.00%)                                                | <i>Astarte crenata</i> agg<br><i>Ctenodiscus crispatus</i><br><i>Spiochaetopterus typicus</i><br>(50.66%)                                                      | <i>Spiochaetopterus typicus</i><br><i>Astarte crenata</i> agg.<br><i>Maldane sarsi</i><br><i>Ctenodiscus crispatus</i><br>(54.28%)     | <i>Astarte crenata</i> agg.<br><i>Maldane sarsi</i><br><i>Chirimia biceps</i><br><i>Ctenodiscus crispatus</i><br>(54.10%)                                                                                          | -                                                                                                                                                           |
| <b>B17</b> | <i>Ctenodiscus crispatus</i><br><i>Spiochaetopterus typicus</i><br><i>Aglaophamus malmgreni</i><br><i>Chirimia biceps</i><br><i>Amphitrite groenlandica</i><br>(51.72%) | <i>Spiochaetopterus typicus</i><br><i>Ctenodiscus crispatus</i><br><i>Aglaophamus malmgreni</i><br><i>Chirimia biceps</i><br><i>Nephtys incisa</i><br>(55.98%) | <i>Spiochaetopterus typicus</i><br><i>Nephtys incisa</i><br><i>Aglaophamus malmgreni</i><br><i>Amphitrite groenlandica</i><br>(51.32%) | <i>Aglaophamus malmgreni</i><br><i>Chirimia biceps</i><br><i>Amphitrite groenlandica</i><br><i>Ctenodiscus crispatus</i><br><i>Spiochaetopterus typicus</i><br><i>Nemertea</i><br><i>Maldane sarsi</i><br>(52.28%) | <i>Astarte crenata</i> agg.<br><i>Ctenodiscus crispatus</i><br><i>Maldane sarsi</i><br><i>Chirimia biceps</i><br><i>Amphitrite groenlandica</i><br>(52.81%) |

**Table S6:** Summary of biodiffusion coefficient ( $D_b$ ,  $\text{cm}^2 \text{year}^{-1}$ ) values determined for the vertical distribution of luminophore particles for each replicate aquarium at each station across both years.

| Year | Replicate    | Station      |               |               |              |              |              |
|------|--------------|--------------|---------------|---------------|--------------|--------------|--------------|
|      |              | B13          | B14           | Xs            | B15          | B16          | B17          |
| 2017 | 1            | 4.362        | 4.989         | -             | 2.199        | 2.735        | 1.941        |
|      | 2            | 4.209        | 3.077         | -             | 1.776        | 2.658        | 1.915        |
|      | 3            | 9.153        | 4.019         | -             | 1.964        | 5.811        | 2.073        |
|      | 4            | 6.631        | 3.859         | -             | 1.748        | 2.607        | 1.768        |
|      | $\bar{x}$ :  | <b>6.089</b> | <b>3.986</b>  | -             | <b>1.922</b> | <b>3.453</b> | <b>1.924</b> |
| SD:  | <b>2.324</b> | <b>0.785</b> | -             | <b>0.208</b>  | <b>1.573</b> | <b>0.125</b> |              |
| 2018 | 1            | 13.368       | 2.856         | 39.558*       | 2.279        | 3.127        | 2.001        |
|      | 2            | 4.658        | 2.271         | 10.593        | 1.927        | 1.951        | 2.906        |
|      | 3            | 1.677        | 7.420         | 11.523        | 3.207        | 2.178        | 1.711        |
|      | 4            | 7.905        | 5.328         | 5.128         | 5.484        | 2.943        | 3.863        |
|      | $\bar{x}$ :  | <b>6.902</b> | <b>4.469</b>  | <b>16.700</b> | <b>3.224</b> | <b>2.550</b> | <b>2.621</b> |
| SD:  | <b>5.005</b> | <b>2.372</b> | <b>15.497</b> | <b>1.600</b>  | <b>0.573</b> | <b>0.972</b> |              |

\*includes extensive gallery and mounding by a single individual of the amphipod *Quasimelita quadrispinosa* (see Figure S16 and outlier in Figure 3 of the main manuscript)

**Figure S16:** Extensive mound and gallery formation by a single individual of the amphipod *Quasimelita quadrispinosa* (foreground, centre right) in aquarium replicate 1, Station Xs. The green coloration is the luminophore tracer (aquarium internal width = 20 cm).

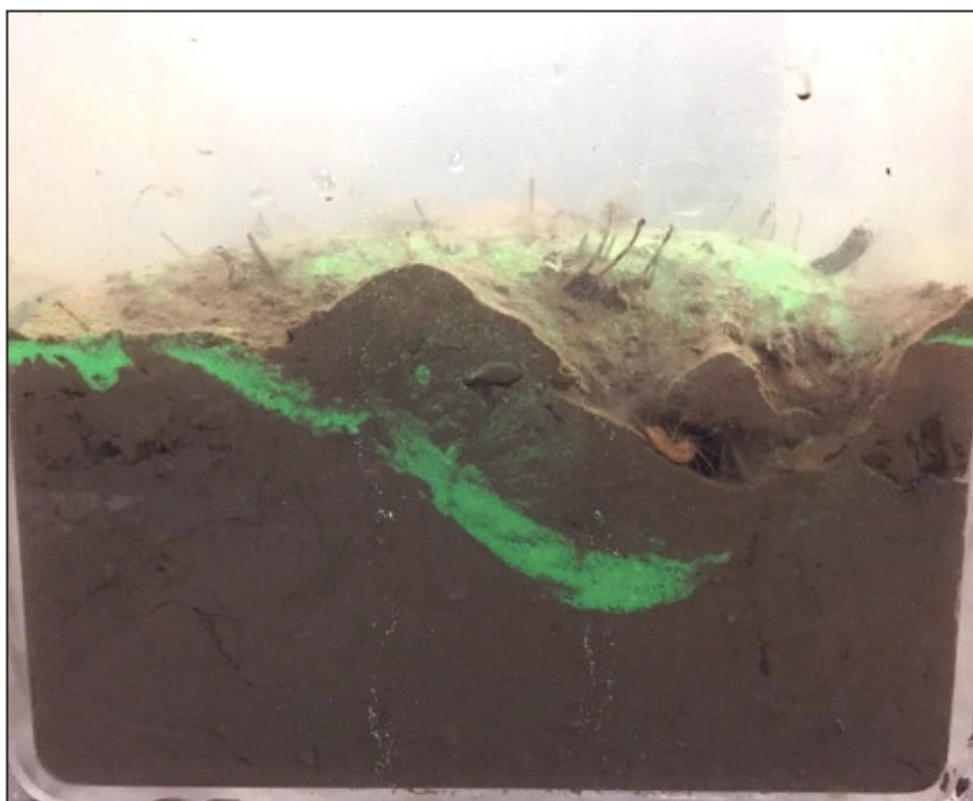

**Figure S17:** The effects of station and year on mean ( $\pm$  s.e.,  $n = 4$ ) organic material (loss on ignition) of surface sediments for stations B13-B17 in 2017 (black) and stations B13-B17 and Xs in 2018 (grey). Individual replicate values are presented in Table S3.

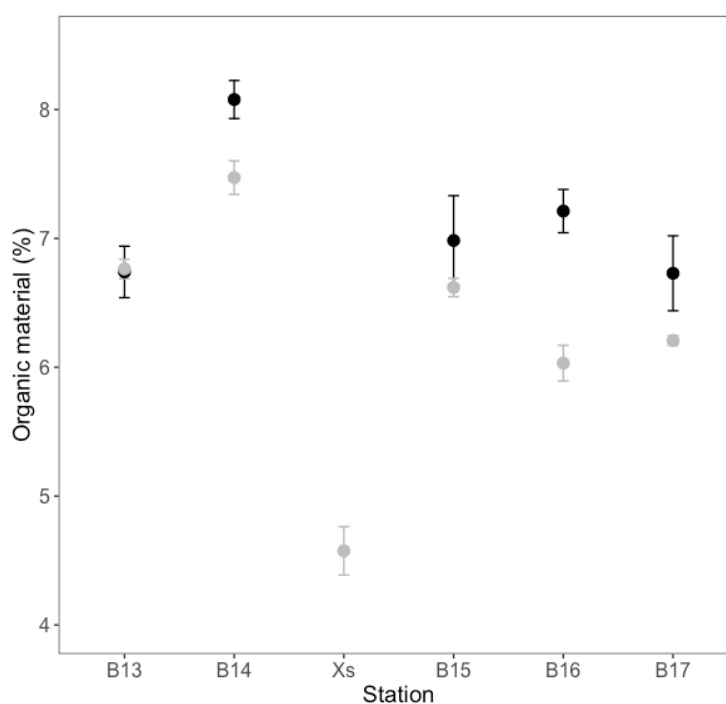

### Supplementary material references

Blott SJ, Pye K. 2001. GRADISTAT: A grain size distribution and statistics package for the analysis of unconsolidated sediments. *Earth Surf. Process. Landforms* 26, 1237-1248 (doi: 10.1002/esp.261)

Fetterer F, Savoie M, Helfrich S, Clemente-Colón P. 2010, updated daily. Multisensor Analyzed Sea Ice Extent - Northern Hemisphere (MASIE-NH), Version 1. [Indicate subset used]. Boulder, Colorado USA. NSIDC: National Snow and Ice Data Center. (doi: <https://doi.org/10.7265/N5GT5K3K>) [accessed 30/01/2020].

ENDS.
